1 **Differentiation signals from glia are fine-tuned to set neuronal numbers during**  
2 **development**

3

4 Anadika R. Prasad<sup>1</sup>†, Matthew P. Bostock<sup>1</sup>†, Inês Lago-Baldaia<sup>1</sup>, Zaynab Housseini<sup>1</sup> and  
5 Vilaiwan M. Fernandes<sup>1\*</sup>.

6

7 <sup>1</sup>Department of Cell and Developmental Biology, University College London, Gower Street,  
8 London, WC1E 6DE.

9 †These authors contributed equally to the work.

10 \*Corresponding author; [vilaiwan.fernandes@ucl.ac.uk](mailto:vilaiwan.fernandes@ucl.ac.uk)

11

12

13 **Abstract**

14 Precise neuronal numbers are required for circuit formation and function. Known strategies to  
15 control neuronal numbers involve regulating either cell proliferation or survival. In the  
16 developing *Drosophila* visual system photoreceptors from the eye-disc induce their target field,  
17 the lamina, one column at a time. Although each column initially contains ~6 precursors, only 5  
18 differentiate into neurons of unique identities (L1-L5); the ‘extra’ precursor undergoes apoptosis.  
19 We uncovered that Hedgehog signalling patterns columns, such that the 2 precursors  
20 experiencing the lowest signalling activity are specified as L5s; only one differentiates while the  
21 other ‘extra’ precursor dies. We showed that a glial population called the outer chiasm giant glia  
22 ( $xg^O$ ), which reside below the lamina, relays differentiation signals from photoreceptors to  
23 induce L5 differentiation. The precursors nearest to  $xg^O$  differentiate into L5s and antagonise  
24 inductive signalling to prevent the ‘extra’ precursors from differentiating, resulting in their death.  
25 Thus, tissue architecture and feedback from young neurons fine-tune differentiation signals from  
26 glia to limit the number of neurons induced.

## 1 Introduction

2 Many sensory systems consist of repeated circuit units that map stimuli from the outside  
3 world onto sequential processing layers<sup>1</sup>. It is critical that both absolute and relative neuronal  
4 numbers are carefully controlled for these circuits to assemble with topographic correspondence  
5 across processing layers. Neuronal numbers can be set by controlling how many progeny a  
6 neural stem cell produces, or by regulating how many neural progeny survive<sup>2,3</sup>. To investigate  
7 other developmental strategies that set neuronal numbers, we used the highly ordered and  
8 repetitive *Drosophila melanogaster* visual system. Like vertebrate visual systems, the fly visual  
9 system is organized retinotopically into repeated modular circuits that process sensory input from  
10 unique points in space spanning the entire visual field<sup>4,5</sup>.

11 Retinotopy between the compound eye and the lamina is built during development.  
12 Photoreceptors are born progressively in the eye imaginal disc as a wave of differentiation  
13 sweeps across the tissue from posterior to anterior. Newly born photoreceptors express  
14 Hedgehog (Hh), which promotes further wave propagation<sup>6</sup>. They also express the Epidermal  
15 Growth Factor (EGF), Spitz (Spi), which recruits additional photoreceptors into developing  
16 ommatidia<sup>6</sup>. As photoreceptors are born, their axons project into the optic lobe and induce the  
17 lamina, such that there is a corresponding lamina unit (called a cartridge) for every ommatidium  
18 (Fig. 1A)<sup>4</sup>. Each cartridge is composed of five interneurons (L1-L5; named for the medulla  
19 layers they project to) and multiple glial subtypes<sup>4,7</sup>.

20 Lamina induction is a multi-step process triggered by photoreceptor-derived signals.  
21 Photoreceptor-derived Hh converts neuroepithelial cells into lamina precursor cells (LPCs),  
22 promotes their terminal divisions and orchestrates lamina column assembly, *i.e.* the stacked  
23 association of ~6 post-mitotic LPCs with photoreceptor axon bundles (Fig. 1A,B)<sup>8-11</sup>. Once  
24 assembled into columns, LPCs differentiate into neurons following an invariant spatio-temporal  
25 pattern whereby the most proximal (bottom) and most distal (top) cells differentiate first into L5  
26 and L2, respectively; differentiation then proceeds in a distal-to-proximal (top-to-bottom)  
27 sequence, L3 forming next, followed by L1, then L4<sup>12-14</sup>. The sixth LPC, located between L4 and  
28 L5, does not differentiate but instead is fated to die by apoptosis and is later cleared (Fig. 1A)<sup>15</sup>.  
29 Previously we showed that a population of glia called wrapping glia, which ensheath  
30 photoreceptor axons, induce neuronal differentiation of L1-L4 neurons via Insulin/ Insulin-like  
31 growth factor signalling in response to EGF from photoreceptors<sup>14</sup>. Moreover, L1-L4 neuronal

1 differentiation could be disrupted by manipulating wrapping glia without affecting L5  
2 differentiation<sup>14</sup>. Indeed, the mechanisms that drive L5 differentiation are not known.  
3 Importantly, we do not understand how exactly 5 neuron types differentiate from 6 apparently  
4 equal LPCs; in other words, how are lamina neuronal numbers set?

## 6 **Results**

### 7 *The 'extra' lamina precursor cells are specified as L5s*

8 To probe how only five lamina neurons are invariantly produced from a pool of six  
9 seemingly equivalent precursors, we began by focusing on the 'extra' LPCs, which are located  
10 distal to L5s<sup>9</sup>. To confirm that these cells do indeed undergo apoptosis in normal development,  
11 we used an antibody against the cleaved form of Death Caspase-1 (Dcp-1), an effector caspase,  
12 to detect apoptotic cells<sup>16</sup>. In wild-type animals, we detected Dcp-1 positive apoptotic cells in the  
13 lamina immediately distal to L5 neurons starting from column  $5.15 \pm 0.25$  Standard Error of the  
14 Mean (SEM; N=13; Fig. 1C). Note that for these and later analyses we considered the youngest  
15 column located adjacent to the lamina furrow to be the first column, with column number (age)  
16 increasing towards the posterior (right) side of the furrow (Fig. 1A). Next, we examined the fate  
17 of these cells when apoptosis was blocked in animals mutant for *Death regulator Nedd2-like*  
18 *caspase (Dronc)*, an initiator caspase essential for caspase-dependent cell death<sup>17</sup>. Cleaved Dcp-1  
19 was absent in homozygous *Dronc*<sup>124</sup> animals confirming that apoptosis was blocked (N=26; Fig.  
20 1E). Indeed, we detected cells that were positive for the lamina marker Dachshund (Dac) but  
21 negative for the pan-neuronal marker Elav between L1-L4 and L5 neurons past column 5, which  
22 were never observed in controls (Fig. 1E compared to 1C; N=13). These cells did not express  
23 lamina neuron subtype markers Sloppy paired 2 (Slp2) or Brain-specific homeobox (Bsh), which  
24 L5s co-express and which individually label L1-L3s and L4s, respectively (Fig. 1D,F)<sup>13,14,18</sup>.  
25 Thus, although the 'extra' cells were retained when apoptosis was blocked, they did not  
26 differentiate into neurons.

27 Since retaining the 'extra' LPCs by blocking apoptosis did not reveal their neuronal  
28 potential, we sought to force their differentiation. Previously, we showed that MAPK signalling  
29 is necessary and sufficient to drive L1-L4 neuronal differentiation<sup>14</sup>. High levels of double-  
30 phosphorylated MAPK (dpMAPK), indicative of pathway activity, preceded neuronal  
31 differentiation (assessed by Elav expression), not just for L1-L4s, but also for L5s (Fig. 1G;

1 N=7), suggesting that MAPK signalling is involved in differentiation for all neuronal types.  
2 Therefore, we hyperactivated the pathway by using a lamina-specific Gal4 to drive an activated  
3 form of MAPK (MAPK<sup>ACT</sup>) or of a transcriptional effector of the pathway, Pointed P1 (PntP1).  
4 Importantly, we combined this Gal4 with a temperature sensitive form of Gal80, Gal80<sup>ts</sup>, to  
5 restrict expression during development; this driver is referred to as *Lamina<sup>ts</sup>* henceforth (Fig.  
6 S1C,D and Fig. 1H,I). As reported previously, hyperactivating MAPK signalling in the lamina  
7 led to premature neuronal differentiation: instead of sequential differentiation of L1-L4, seen as a  
8 triangular front, most lamina columns differentiated simultaneously (Fig. 1H, N=17, Fig. S1A,C,  
9 N=10)<sup>14</sup>. We observed no LPCs that remained undifferentiated (Dac<sup>+</sup> and Elav<sup>-</sup>) past lamina  
10 column 5, including the row of cells just distal to L5s (Fig. 1H, S1A,C). Interestingly, we also  
11 observed a concomitant decrease in cleaved Dcp-1 positive cells (Fig. 1H, J), suggesting that  
12 forcing the ‘extra’ LPCs to differentiate blocked their death.

13 We next asked which lamina neuron subtype the ‘extra’ LPCs could give rise to when  
14 induced to differentiate. Using Slp2 and Bsh to distinguish between lamina neurons, we often  
15 observed two rows of cells co-expressing Slp2 and Bsh in the proximal lamina (Fig. 1I, S1B,D),  
16 indicating the presence of ectopic L5s. However, the presence of ectopic cells could be due to  
17 premature differentiation, rather than ectopic induction of a particular cell type. In control  
18 animals, columns are fully differentiated (Elav<sup>+</sup>) from column 7 onwards (Fig. S1E). Therefore,  
19 to distinguish between premature and ectopic differentiation, we quantified the number of lamina  
20 neuron types (L1-L3, L4 and L5) per column from column 7 onwards. While there was no  
21 significant difference between the average number of L1-L3s or L4s per column, the average  
22 number of L5s/column was ~1.4-fold higher in laminas in which differentiation was ectopically  
23 induced compared with controls (Figs. 1K,L). Thus, hyperactivating MAPK signalling in the  
24 lamina drives ectopic differentiation of L5 neurons. Importantly, ectopic L5s were only observed  
25 in the proximal but never in the distal lamina (Fig. 1I, N=18/18; Fig. S1D, N=9/9). Taken  
26 together, the absence of cell death in the row proximal to L5s and the presence of ectopic L5s in  
27 this row indicate that hyperactivating MAPK signalling induces the ‘extra’ LPCs to differentiate  
28 into L5s. Thus, LPCs are not equivalent as previously assumed; instead, they are patterned with  
29 fixed neuronal identities along the distal to proximal axis, such that the two most proximal rows  
30 of LPCs are specified as L5s and differentiate accordingly when induced.

31



## 1 *Hh signalling patterns lamina precursor cells*

2 To uncover how regional differences in LPC specification arise, we integrated published  
3 single-cell RNA sequencing datasets for developmental timepoints that span lamina  
4 development<sup>19–21</sup> (Fig. S2A; See Materials and Methods). As published previously, on uniform  
5 manifold approximation and projection (UMAP) visualizations L1, L2, L3 and L4 neuronal  
6 clusters were closer to each other than they were to the L5 cluster<sup>20</sup>. The LPC cluster was  
7 connected to differentiated neurons by two streams or tails of cells - one leading to the L1-L4  
8 clusters and the other leading to the L5 cluster (Fig. 2A). Such convergent tails in UMAP  
9 visualizations are thought to represent intermediate states between progenitors and differentiated  
10 cells, suggesting that L1-L4 and L5 neurons have distinct developmental trajectories from a  
11 common pool of LPCs<sup>19,20</sup>. We considered the possibility that these data could support a model  
12 proposed previously whereby L5 neurons have a distinct developmental origin to the L1-L4  
13 neurons<sup>22</sup> (See supplementary text). To test this possibility, we used mitotic recombination to  
14 label the lineages of neuroepithelial cells with low induction frequency. These resulted in  
15 compact patches of lamina cells being labelled, indicating that there is relatively little cell mixing  
16 (Fig. S2B,C; 13/13 clones). Importantly, the lineages of individual neuroepithelial cells  
17 contained all the lamina neuron types, including L5s, thus indicating that all lamina neurons have  
18 the same developmental origin (Fig. S2B,C; 13/13 clones; See Supplementary text).

19 We asked what transcripts distinguished L5 precursors from L1-L4 precursors, and,  
20 surprisingly, we found that several well-established Hh signalling targets were expressed at  
21 higher levels in the L1-L4 tail compared with the L5 tail, suggesting the L5 precursors  
22 experience lower Hh signalling than other lamina precursors. These included the direct  
23 transcriptional target *patched* (*ptc*), as well as *single-minded* (*sim*), *rhomboid* (*rho*) and *Zn finger*  
24 *homeodomain 1* (*zfh1*) (Fig. 2B,C,D and E)<sup>11,23–25</sup>. Indeed, a transcriptional reporter for *ptc* (*ptc-*  
25 *lacZ*) was expressed at lower levels in L5 neurons compared with L1-L4 neurons (Fig. 2F, S2D).  
26 Consistent with the transcriptomic data, *ptc* expression eventually decreased in older neurons  
27 (Fig. 2B,F, S2D). Importantly, in young columns prior to neuronal differentiation, *ptc-lacZ*  
28 expression was highest in the distal lamina and decreased towards the proximal lamina  
29 (quantified in Fig. S2D with summary statistics from a mixed effects linear model in Table S1).  
30 *Sim* expression showed a similar distribution (Fig. S2E). These data indicate that Hh signalling  
31 levels are highest in the distal lamina and lowest in the proximal lamina.

1 Hh signalling is known to trigger the early steps of lamina development, including the  
2 expression of early lamina markers such as *dac* and *sim*, terminal LPC divisions and column  
3 assembly<sup>8-11</sup>, but no role for Hh in lamina neuron specification or differentiation has been  
4 identified. We wondered whether Hh signalling could specify neuronal identity in LPCs;  
5 specifically, we hypothesised that low Hh signalling levels specify LPCs which will give rise to  
6 L5s. To test this, we disrupted Hh signalling using a temperature sensitive allele of *hh* (*hh<sup>ts2</sup>*). We  
7 raised homozygous mutant *hh<sup>ts2</sup>* animals at the permissive temperature (18°C) and then shifted  
8 them to the restrictive temperature (29°C) for either 6, 12, 24, 45 or 72 hours before dissecting at  
9 the white prepupa stage (Fig. 2G-M). Consistent with the known role of Hh signalling in early  
10 lamina development, we recovered fewer and fewer lamina neurons with increasing lengths of  
11 temperature shifts (Fig. S2F), with no LPCs or L-neurons recovered for the 45- and 72-hour  
12 temperature shifts (N<sup>45h-ts</sup>=10; N<sup>72h-ts</sup>=10; Fig. 2L,M)<sup>8</sup>. However, for the 6-, 12- and 24-hour  
13 temperature shifts, we observed cells expressing the markers *Slp2* and *Bsh* either individually or  
14 in combination (Figs. 2I-K). In these brains, we observed *Slp2* and *Bsh* co-expressing cells in  
15 higher proportions relative to the total number of neurons (*Elav+* cells) with increasing  
16 temperature shift lengths, until at the 24-hour temperature shift, nearly all the neurons present  
17 were L5s (Fig. 2I-K; quantified in Fig. 2N; N<sup>6h-ts</sup>=14; N<sup>12h-ts</sup>=12; N<sup>24h-ts</sup>=17). Importantly, under  
18 these conditions L5s were no longer confined to the proximal lamina but were also observed in  
19 distal positions (Fig. 2I-K). These experiments indicate that reducing Hh signalling leads to an  
20 increased number of L5s in the lamina, at the expense of other lamina neuron types.

21 Since Hh is also required for photoreceptor development, we sought to disrupt Hh signalling  
22 cell autonomously in the lamina and assess the effects on lamina neuron specification. To this  
23 end, we expressed a repressor form of the transcriptional effector of Hh signalling, *Cubitus*  
24 *interruptus* (*Ci<sup>repressor</sup>*)<sup>26</sup> in the lamina (Fig. 2O). This led to a higher proportion of *Bsh*- and *Slp2*-  
25 positive L5s being present relative to other lamina neuron subtypes. In these brains, L5s were  
26 distributed throughout the distal-proximal axis and no longer restricted to the proximal lamina  
27 (Fig. 2O, N=10). Similarly, knocking down *Ci* in the lamina by RNA interference (*Ci<sup>RNAi</sup>*) (Fig.  
28 S2G; N=11) or mis-expressing the kinesin-family protein *Costal 2* (*Cos2*) (Fig. S2H; N=14),  
29 which increases processing of full-length *Ci* to its repressive form<sup>27</sup>, resulted in ectopic L5s.  
30 Thus, decreasing Hh signalling autonomously within LPCs led to the production of L5 neurons  
31 distributed throughout the distal-proximal axis at the expense of other lamina neuron types.

1        Since reducing Hh signalling resulted in ectopic L5s, we next asked whether increasing Hh  
2 signalling autonomously in the proximal lamina would disrupt L5 specification and generate  
3 ectopic neurons with distal identities (*i.e.* L2/L3). We induced gain-of-function in Hh signalling  
4 by generating positively-labelled clones<sup>28</sup> that were homozygous mutant for a null allele of *ptc*,  
5 which encodes a negative regulator of the pathway<sup>23,27</sup>. Homozygous *ptc* mutant clones never  
6 contained L5s (Slp2 and Bsh co-expressing cells) but instead only contained neurons singly  
7 positive for Slp2, indicative of L2/L3 identity (Fig. 2P; 17/17 clones from 15 optic lobes). Thus,  
8 increasing Hh signalling in the proximal lamina results in L2/L3 specification at the expense of  
9 L5 specification. In summary, we have identified an unexpected role for Hh signalling levels in  
10 LPCs, such that L5s can only be specified if Hh activity is low, and only L2/L3s can be specified  
11 when Hh activity is high.

12

13 *Outer chiasm giant glia (xg<sup>O</sup>) induce L5 neuronal differentiation in response to EGF from*  
14 *photoreceptors*

15        The two most proximal rows of LPCs experience low levels of Hh signalling and  
16 consequently can give rise to L5s when induced to differentiate; in normal development, one row  
17 is fated to produce L5s, while the other is fated to die. This led us to ask what induces only the  
18 most proximal LPC row to differentiate into L5s, while the adjacent distal row is eliminated.  
19 Since we showed previously that wrapping glia induce L1-L4 neuronal differentiation in  
20 response to EGF from photoreceptors, but that L5 differentiation proceeded normally in these  
21 conditions<sup>14</sup>, we speculated that another glial population may be involved in inducing L5  
22 differentiation in response to EGF from photoreceptors. To test this hypothesis, we blocked  
23 EGFR signalling in all glia using a pan-glial driver. This led to a complete block in lamina  
24 neuron differentiation as seen by the absence of any Elav positive cells, though LPCs (Dac+  
25 cells) still formed and assembled into columns (Fig. 3A,B). Thus, EGFR activity in a glial  
26 population other than the wrapping glia is required for L5 neuronal differentiation.

27        Since many glial types infiltrate the lamina (Fig. S3A)<sup>29,30</sup>, we performed a screen using glia  
28 subtype-specific Gal4s to block EGFR signalling and evaluated the presence of L5s by Elav  
29 expression (Fig. S3B-M; summarised in Table S2). Blocking EGFR signalling in the outer  
30 chiasm giant glia (xg<sup>O</sup>) led to a dramatic reduction in the number of L5s (Fig. 3C,D, S3N; See  
31 Supplementary text). The xg<sup>O</sup> are located below the lamina plexus, often with just one or two

1 cells spanning the entire width of the lamina. While the  $xg^0$  extend fine processes towards the  
2 lamina, they do not appear to contact LPCs or L5 neurons (Fig. S3O). Moreover, blocking EGFR  
3 signalling in the  $xg^0$  did not affect  $xg^0$  numbers or morphology (Fig. 3C,D, S3O-R). To test  
4 whether L5 neurons specifically were lost when EGFR activity was blocked in  $xg^0$ , we used  
5 antibodies against Bsh and Slp2 together with Svp, which marks L1s. We found that the numbers  
6 of L5 neurons specifically were decreased, while numbers of all the other neuron types were  
7 unaffected (Fig. 3E-G;  $P^{L5} < 0.0001$ , Mann-Whitney U-test). To test whether the absence of L5s  
8 did not simply reflect a developmental delay, we examined adult optic lobes using a different L5  
9 neuronal marker, POU domain motif 3 (Pdm3)<sup>13</sup>. Similar to our results in the larval lamina, L5s  
10 were mostly absent in the adult lamina when EGFR was blocked in  $xg^0$  compared with controls  
11 (Fig. S3S,T;  $N^{exp}=10$ ;  $N^{ctrl}=11$ ).

12 The loss of L5 neurons when EGFR was blocked in  $xg^0$  could be explained either by a defect  
13 in neuronal differentiation, or by an earlier defect in LPC formation or recruitment to columns.  
14 To distinguish between these possibilities, we counted the number of LPCs per column when  
15 EGFR signalling was blocked in  $xg^0$  compared to controls (Fig. 3H). In columns 1-4, there were  
16 no differences in the number of LPCs, indicating that LPC formation and column assembly  
17 occurred normally. Thus, although LPCs formed and assembled into columns normally, L5s  
18 failed to differentiate; supporting the hypothesis that in response to EGFR activity  $xg^0$  induce  
19 proximal LPC neuronal differentiation into L5s. Importantly, the number of LPCs began to  
20 decrease in older columns (column 5 onwards) when EGFR signalling was blocked in  $xg^0$  (Fig.  
21 3H). This observation suggested that undifferentiated LPCs in the proximal lamina are  
22 eliminated by apoptosis, similar to the ‘extra’ LPCs in controls. Consistently, we observed Dcp-1  
23 positive cells in the most proximal row of the lamina beginning on average in column  $5.93 \pm$   
24  $0.18SEM$  ( $N=19$ ; Fig. 3I,J). Altogether these results show that EGFR activity in  $xg^0$  induces the  
25 differentiation of L5 neurons, and that proximal LPCs which fail to receive appropriate cues  
26 from  $xg^0$  die by apoptosis.

27 Since EGFR activity in wrapping glia is triggered by EGF from photoreceptors<sup>14</sup>, we tested  
28 whether photoreceptor-EGF could also contribute to activating EGFR in  $xg^0$ . We took advantage  
29 of a mutant for *rhomboid 3* (*rho3*) in which photoreceptors are specified but cannot secrete Spi  
30 from their axons<sup>31</sup>, resulting in failure of L1-L4 neurons to differentiate (Fig. 3K;  $N=9$ )<sup>14,31</sup>. In  
31 addition to disrupted L1-L4 neuronal differentiation, we previously showed that only a few L5

1 neurons differentiated in *rho3* animals (Fig. 3K; N=9)<sup>14</sup>. To test whether  $xg^O$  induce L5 neuronal  
2 differentiation in response to photoreceptor-EGF, we restored expression of wild-type Rho3 only  
3 in photoreceptors in *rho3* mutant animals using a photoreceptor-specific driver (GMR-Gal4).  
4 Rho3 function in photoreceptors was sufficient to fully rescue not only L1-L4 neuronal  
5 differentiation, as previously reported, but also L5 neuronal differentiation (Fig. 3L; N=8). Thus,  
6 similar to wrapping glia for L1-L4s,  $xg^O$  respond to EGF from photoreceptors to induce proximal  
7 LPCs to differentiate into L5 neurons.

8

9 *Outer chiasm giant glia secrete multiple ligands to induce MAPK-dependent neuronal*  
10 *differentiation of L5s.*

11 We next asked what signals the  $xg^O$  secrete to induce L5 differentiation. Since  
12 autonomously hyperactivating MAPK signalling in LPCs was sufficient to drive ectopic L5  
13 neuronal differentiation (Fig. 1H, I, S1C,D), the signals inducing differentiation likely act  
14 upstream of the MAPK signal transduction cascade. We first confirmed that MAPK signalling is  
15 both necessary and sufficient to induce neuronal differentiation of L5s, and moreover that  
16 reducing MAPK activity results in death of LPCs (See Supplementary text and Figs. S4A-D).  
17 Given this requirement, we reasoned that the differentiation signals from  $xg^O$  must lead to  
18 activation of MAPK signalling in proximal LPCs, likely through a Receptor Tyrosine Kinase  
19 (RTK). Indeed, blocking EGFR signalling in  $xg^O$  resulted in decreased dpMAPK levels  
20 specifically in the proximal lamina (Fig. S4E compared with 1G). The *Drosophila* genome  
21 encodes 22 ligands which activate 10 RTKs upstream of MAPK signalling<sup>32</sup>. To identify the  
22 signal(s) secreted by  $xg^O$ , we overexpressed these ligands and screened for their ability to rescue  
23 the loss of L5s caused by blocking EGFR activity in the  $xg^O$ . To validate this approach, we  
24 tested whether autonomously restoring transcriptional activity downstream of MAPK in  $xg^O$   
25 while blocking EGFR could rescue L5 differentiation. While blocking EGFR in  $xg^O$  resulted in  
26 7.3% ( $\pm 1.6$ SEM) L5s compared to control, co-expressing PntP1 with EGFR<sup>DN</sup> in  $xg^O$  rescued L5  
27 numbers to 24.7% ( $\pm 2.9$ SEM) of control laminae ( $P < 0.0001$  compared to EGFR DN alone; Fig.  
28 S4F). We then screened 18 ligands based on available reagents (Fig. S4F). Expression of four  
29 ligands resulted in statistically significant rescues of L5 numbers (Fig. S4F). To eliminate false  
30 positive hits, we examined enhancer trap lines and published reports to determine whether these  
31 ligands are expressed in  $xg^O$  under physiological conditions (See Supplementary text and Fig.

1 S4G-J). This enabled us to narrow down our hits to two ligands: the EGF Spi and Col4a1, a type  
2 IV collagen, which both rescued L5 differentiation resulting in laminas with 17.4% ( $\pm 1.9$ SEM)  
3 and 19.7% ( $\pm 2.2$ SEM) of the control number of L5s, respectively ( $P^{\text{Spi}} < 0.01$  and  $P^{\text{Col4a1}} < 0.0005$ ;  
4 Figs. 4A-H, S4F). Col4a1 is thought to activate MAPK signalling through its putative receptor,  
5 the Discoidin domain receptor (Ddr)<sup>32</sup>. We used an enhancer trap in the *Ddr* locus and observed  
6 that *Ddr* was expressed in LPCs (Fig. S4K).

7 Spi activates EGFR<sup>32</sup>, which was shown to be expressed in LPCs<sup>12</sup>. We ruled out the trivial  
8 explanation that the rescue of L5 numbers by Spi was caused by autocrine EGFR reactivation in  
9 the  $xg^0$ , as Spi expression in  $xg^0$  did not autonomously rescue dpMAPK nuclear localisation  
10 when EGFR signalling was blocked (Fig. S4L). To test whether *spi* expression in  $xg^0$  was indeed  
11 regulated by EGFR signalling, we measured *spi* mRNA levels using *in situ* hybridisation chain  
12 reaction. Disrupting EGFR signalling in  $xg^0$  resulted in significantly reduced fluorescence signal  
13 for *spi* mRNA in  $xg^0$  compared with controls (Figs. S4M-O;  $P < 0.01$ ). Thus,  $xg^0$  express *spi* in  
14 response to EGFR activity. Moreover, expressing *spi* or *Col4a1* in  $xg^0$  in which EGFR signalling  
15 was blocked rescued dpMAPK signal in L5s (Fig. S4P,Q), indicating that these ligands, when  
16 expressed from  $xg^0$  are sufficient to activate MAPK signalling in the rescued L5s.

17 Next, we tested whether Spi or Col4a1 could induce ectopic L5 differentiation when  
18 overexpressed in the  $xg^0$ . Expression of either ligand resulted in a 47.6% ( $\pm 3$ SEM,  $P < 0.0001$ )  
19 and 12.6% ( $\pm 4$ SEM,  $P < 0.01$ ) increase in the number of L5s/column for Spi and Col4a1,  
20 respectively (Fig. 4I-K). Thus, Spi and Col4a1 are each sufficient to induce ectopic L5  
21 differentiation when overexpressed in the  $xg^0$ . Given these results, we wondered why expressing  
22 either factor resulted in an incomplete rescue of L5 differentiation when EGFR was blocked in  
23  $xg^0$ . We speculated that expressing Spi or Col4a1 alone may not lead to consistently high levels  
24 of MAPK activity to induce neuronal differentiation in the proximal lamina. Therefore, we  
25 expressed both ligands together to assay whether they could rescue L5 differentiation when  
26 EGFR signalling was blocked in  $xg^0$ . Strikingly, this led to an enhanced and statistically  
27 significant rescue relative to expressing either one alone, resulting in laminas with 31.2% ( $\pm 2.9$   
28 SEM) of the control number of L5s ( $P < 0.0001$ ; Figs. 4L-P). Altogether, we find that  $xg^0$  secrete  
29 multiple factors that lead to activation of the MAPK cascade to induce differentiation of L5s in  
30 the proximal lamina.

31



1 *Newly born L5 neurons inhibit differentiation of distal neighbours to set neuronal number*

2         Although the two most proximal rows of LPCs are specified as L5s, signals from the  $xg^O$   
3 induce only the most proximal row to differentiate, ensuring that exactly one L5 is present in  
4 each lamina column. How this tight control of neuronal number is achieved is perplexing given  
5 that  $xg^O$  induce differentiation by secreting diffusible factors. One possible mechanism is that  
6 newly-induced L5s may limit the ability of more distal LPCs to differentiate, by preventing  
7 MAPK activation in neighbouring cells. To test this hypothesis, we examined the expression of  
8 *argos* (*aos*), a secreted antagonist of EGFR signalling, and transcriptional target of the  
9 pathway<sup>33,34</sup>. An enhancer trap in the *aos* locus, *aos<sup>W11</sup>* was expressed in  $xg^O$  and differentiating  
10 L-neurons, with the highest levels detected in L5s (Fig. 5A). Interestingly, we also noted ectopic  
11 L5s in the laminae of *aos<sup>W11</sup>* heterozygotes, which could be the result of decreased Aos  
12 expression, as *aos<sup>W11</sup>* is a loss-of-function allele (Fig. 5A). These observations suggested that  
13 Aos could act in L5s as a feedback-induced sink for EGF ligands to limit further differentiation  
14 in the columns. To test this hypothesis, we knocked down *aos* by RNAi using a driver expressed  
15 in developing L5s specifically<sup>35</sup> (Fig. 5B). We observed a statistically significant ~1.2-fold  
16 increase in the number of L5s (Fig. 5C-E;  $P < 0.0005$ ). Thus,  $xg^O$  induce MAPK activity in the  
17 most proximal LPCs, resulting in their differentiation and in the production of the feedback  
18 inhibitor Aos. In turn, Aos limits further differentiation in the column by fine-tuning the  
19 availability of the differentiation signal Spi, which ensures that only one L5 differentiates per  
20 column, and determines the final number of neurons in each lamina column.

21

22 **Discussion**

23         Appropriate circuit formation and function require that neuronal numbers are tightly  
24 regulated. This is particularly important for the visual system, which is composed of repeated  
25 modular circuits spanning multiple processing layers. In *Drosophila*, photoreceptors induce their  
26 target field, the lamina, one unit at a time, thus, establishing retinotopy between the compound  
27 eye and the lamina<sup>8</sup>. Each lamina unit or column in the adult is composed of exactly 5 neurons;  
28 however, columns initially contain 6 LPCs. The sixth, or ‘extra’, LPC, invariantly located  
29 immediately distal to the differentiating L5 neuron, is fated to die by apoptosis. Here we show  
30 that these LPCs are specified as L5 neurons, effectively doubling the pool of LPCs that can give  
31 rise to L5s (Fig. 1). Most developmental strategies described thus far for setting neuronal number



1 do so by regulating proliferation and/or survival<sup>2</sup>. Here, we have defined a unique strategy  
2 whereby L5 neuronal numbers are set by regulating how many precursors from a larger pool are  
3 induced to differentiate, followed by programmed cell death of the excess precursors. We  
4 showed that a glial population called  $xg^O$ , which are located proximal to the lamina, secrete  
5 multiple ligands (Spi, Col4a1) that activate MAPK signalling in LPCs to induce their  
6 differentiation (Fig. 4, S4). The tissue architecture is such that secreted signals from the  $xg^O$   
7 reach the most proximal row of LPCs first, and therefore these precursors differentiate first.  
8 Upon differentiation, these newly induced neurons secrete the Spi antagonist Aos to limit the  
9 available pool of Spi and prevent further cells from differentiating (Figs. 5 and 6). Thus, the  
10 structure of the tissue together with feedback from newly induced neurons set neuronal number  
11 by limiting which and, therefore, how many LPCs are induced to differentiate.

12

### 13 *Hh signalling and neuronal identity*

14 While Hh signalling has long been known to instruct the early stages of lamina  
15 development, here we uncovered a previously undescribed role for Hh signalling in specifying  
16 neuronal identity. Moreover, our results highlight a remarkable similarity with the vertebrate  
17 neural tube where graded Sonic Hedgehog (Shh) signalling patterns neural progenitors<sup>36,37</sup>.  
18 Exactly how differential Hh signalling levels are achieved along the distal-proximal axis of  
19 lamina columns is still mysterious as photoreceptors are the only source of Hh during lamina  
20 development<sup>8</sup> and their axons span the length of the lamina. Nonetheless, our observations raise  
21 the tantalizing possibility that Hh may act as a morphogen along the distal to proximal axis in the  
22 lamina, similar to Shh along the dorsoventral axis of the neural tube<sup>36,37</sup>. An alternative model  
23 for how Hh could pattern the lamina is that LPCs may have different levels of Hh signalling  
24 levels at birth, leading them to sort into set distal-proximal positions during column assembly  
25 through differential adhesion<sup>10,11</sup>. Along with these possibilities, it will also be important to test  
26 whether differential Hh signalling levels alone specify all five neuronal identities or whether  
27 additional inputs are needed.

28

### 29 *Co-ordinating development through glia*

30 We have shown that in addition to the wrapping glia<sup>14</sup>, another population of glia, the  
31  $xg^O$ , also receive and relay signals from photoreceptors to induce neuronal differentiation in the

1 lamina (Fig. 3K-L). Remarkably,  $xg^O$  are born from central brain DL1 type II neuroblasts and  
2 migrate into the optic lobes to positions below the developing lamina<sup>38,39</sup>. This underscores an  
3 extraordinary degree of coordination and interdependence between the compound eye, optic lobe  
4 and central brain. Photoreceptor signals drive wrapping glial morphogenesis and infiltration into  
5 the lamina<sup>40</sup>, thus setting the pace of L1-L4 neuronal differentiation<sup>14</sup>. Defining the signals that  
6 enable  $xg^O$  to navigate the central brain and optic lobe will be a critical contribution to our  
7 understanding of how development is coordinated across brain regions.

8

### 9 *Tissue architecture sets up stereotyped programmed cell death*

10 In both vertebrate and invertebrate developing nervous systems, programmed cell death is  
11 thought to come in two broad flavours: first as an intrinsically programmed fate whereby specific  
12 lineages or identifiable progenitors, neurons or glia undergo stereotyped clearance<sup>2,3,41,42</sup>, and  
13 second as an extrinsically controlled outcome of competition among neurons for limited target-  
14 derived trophic factors, which adjust overall cell numbers through stochastic clearance (also  
15 known as the neurotrophic theory)<sup>2,3,42,43</sup>. In the lamina, although the LPCs eliminated by  
16 programmed cell death are identifiable and the process stereotyped, it does not appear to be  
17 linked to an intrinsic programme. Rather, the predictable and stereotyped nature of apoptosis and  
18 differentiation are a consequence of stereotyped responses to extrinsic signalling determined by  
19 the architecture of the tissue. Thus, our work highlights that stereotyped patterns of apoptosis can  
20 arise from extrinsic signalling, suggesting a new mode to reliably pattern development of the  
21 nervous system.

22 In many contexts, neurotrophic factors promote cell survival by activating MAPK  
23 signalling<sup>44,45</sup>. In the lamina, MAPK-induced neuronal differentiation and cell survival appear  
24 intimately linked. LPCs that do not activate MAPK signalling sufficiently do not differentiate  
25 and are eliminated by apoptosis, likely through regulation of the proapoptotic factor Hid, which  
26 has been described extensively in flies<sup>46-48</sup>. Thus, here the  $xg^O$ -secreted ligands Spi and Col4a1,  
27 which activate MAPK, appear to be functioning as differentiation signals as well as trophic  
28 factors. Col4a1, in particular, may perform dual roles by promoting MAPK activity directly  
29 through its receptor Ddr, and perhaps also by limiting Spi diffusivity to aid in localising MAPK  
30 activation.

31

1 It will be interesting to determine whether the processes described here represent  
2 conserved strategies for regulating neuronal number. Certainly, given the diversity of cell types  
3 and complexity of tissue architecture in vertebrate nervous systems, exploiting tissue architecture  
4 would appear to be an effective and elegant strategy to regulate cell numbers reliably and  
5 precisely.

6

## 7 **Methods**

### 8 *Drosophila stocks and maintenance:*

9 *Drosophila melanogaster* strains and crosses were reared on standard cornmeal medium and  
10 raised at 25°C or 29°C or shifted from 18°C to 29°C for genotypes with temperature sensitive  
11 Gal80, as indicated in Table S3.

12 We used the following mutant and transgenic flies in combination or recombined in this study  
13 (See Table S3 for more details; {} enclose individual genotypes, separated by commas):

14 {*y,w,hsflp<sup>122</sup>; sp/Cyo; TM2/TM6B*}, {*y,w; sp/Cyo, Bacc-GFP; Dr/TM6C*}, (from BDSC: 36349)  
15 {*ey-Gal80; sp/Cyo;*} (BDSC: 35822), {*;Gal80<sup>ts</sup>; TM2/TM6B*} (BDSC: 7108), {*w<sup>1118</sup>; R27G05-*  
16 *Gal4*} (BDSC: 48073), {*w<sup>1118</sup>; 25A01-Gal4*} (BDSC: 49102), {*y,w; R64B07-Gal4;*} (larval L5-  
17 Gal4), {*y,w; hh-Gal4/TM3*} (BDSC: 67493), {*;tub-Gal80<sup>ts</sup>; repo-Gal4/TM6B*}, {*w<sup>1118</sup>; GMR-*  
18 *Gal4/Cyo;*} (BDSC: 9146), {*y,w; Pin/Cyo; repo-QF/TM6B*} (BDSC: 66477), {*y,w; NP6293-*  
19 *Gal4/Cyo, UAS-lacZ;*} (perineurial glia; Kyoto Stock Center: 105188), {*w; NP2276-Gal4/Cyo;*}  
20 (subperineurial glia; Kyoto Stock Center: 112853), {*w<sup>1118</sup>; R54H02-Gal4*} (cortex glia; BDSC:  
21 45784), {*w<sup>1118</sup>; R10C12-Gal4*} (epithelial and marginal glia; BDSC: 47841), {*w; Mz97-Gal4,*  
22 *UAS-Stinger/Cyo;*} (wrapping and  $xg^0$ ; BDSC: 9488), {*w<sup>1118</sup>; R53H12-Gal4*} (chiasm glia;  
23 BDSC: 50456), {*y,w; spi<sup>NP0289</sup>-Gal4/Cyo, UAS-lacZ;*} (Kyoto Stock Center: 112128), {*w<sup>1118</sup>; Cg-*  
24 *Gal4;*} (BDSC: 7011), {*w; bnl<sup>NP2211</sup>-Gal4*} (Kyoto Stock Center: 112825), {*w; ths<sup>MI07139</sup>-*  
25 *Gal4/Cyo; MKRS/TM6B*} (BDSC: 77475), {*; rho3<sup>PLLb</sup>, UAS-CD8::GFP/TM6B*}, {*; UAS-rho3-*  
26 *3xHA;*} (gifts from B. Shilo), {*; aos<sup>w11</sup>/TM6B*} (*aos-lacZ*; BDSC: 2513), {*y,w; hh<sup>ts2</sup>/TM6B*},  
27 {*y,w; ptc-lacZ/Cyo;*} (BDSC: 10514), {*y,w; sp/Cyo, Bacc-GFP; 10xQUAS-6xmCherry-HA*}  
28 (BDSC: 52270), {*y,w; 10xUAS-myrGFP*} (BDSC: 32197), {*; UAS-CD8::GFP;*}, {*; UAS-*  
29 *CD8::GFP*} (gifts from C. Desplan), {*y,w; UAS-nls.lacZ*}, (BDSC: 3956), {*y,w; UAS-LifeAct-*  
30 *GFP/Cyo;*} (BDSC: 35544), {*w<sup>1118</sup>; UAS-Dcr-2;*} (BDSC: 24650), {*w<sup>1118</sup>; UAS-Dcr-2*} (BDSC:  
31 24651), {*; UAS-EGFR<sup>DN</sup>; UAS-EGFR<sup>DN</sup>*} (BDSC: 5364), {*; UAS-aop<sup>ACT</sup>;*} (Kyoto Stock Center:

1 108425),  $\{y,w;UAS-r^{sem};\}$  ( $r^{sem} = MAPK^{ACT}$ ; BDSC: 59006),  $\{w^{1118};UAS-PntPI\}$  (BDSC:  
2 869),  $\{w^{1118};UAS-aos^{RNAi};\}$  (VDRC47181),  $\{y,w;;UAS-Ci^{76}/TM6B\}$  ( $Ci^{76} = Ci^{repressor}$ ; a gift from  
3 J. Treisman),  $\{y;;UAS-Ci^{RNAi}\}$  (BDSC: 64928),  $\{w; UAS-cos; MKRS/TM6B\}$ , (Cos2 or Costa;  
4 Cos; BDSC: 55039),  $\{w;UAS-jeb;\}$  (a gift from A. Gould),  $\{y,w, UAS-Col4aI^{EY11094}/(Cyo);\}$   
5 (BDSC: 20661),  $\{;;UAS-Cg25c-RFP\}^{49}$  ( $Col4aI = Cg25c$ ),  $\{;UAS-Wnt5;\}$  (BDSC: 64298),  
6  $\{;;UAS-s.spi\}$  (a gift from B. Shilo),  $\{;UAS-m.spi::GFP-myc;\}$  (a gift from B. Shilo),  $\{;;UAS-$   
7  $m.spi::GFP-myc\}$  (a gift from B. Shilo),  $\{w, UAS-grk.sec/Cyo;\}$  (BDSC: 58417),  $\{;UAS-$   
8  $vn^{EPgy}/Cyo;\}$  (BDSC: 58498),  $\{;;UAS-krn-3xHA\}$  (FlyORF: F002754),  $\{;UAS-bnl/Cyo;$   
9  $MKRS/TM6C\}$  (BDSC: 64232),  $\{;UAS-Ilp1;\}$ ,  $\{;UAS-Ilp6;\}$  (gifts from P. Leopold),  $\{w^{1118}, UAS-$   
10  $PvfI^{XP};;\}$  (BDSC: 19632),  $\{w^{1118}; UAS-Pvf2^{XP};\}$  (BDSC: 19631),  $\{;UAS-Wnt4^{EPgy2}/Cyo;\}$   
11 (BDSC: 20162),  $\{;;UAS-boss-3xHA\}$  (FlyORF: F001365),  $\{y,sev; SAM.dCas9.Trk;\}$  (BDSC:  
12 81322),  $\{y,sev; SAM.dCas9.Pvf3;\}$  (BDSC: 81346),  $\{y,sev; SAM.dCas9.ths;\}$  (BDSC: 81347),  
13  $\{y,sev; SAM.dCas9.pyr;\}$  (BDSC: 81330),  $\{w^{1118}; Ddr^{CR01018}-Gal4;\}$  (BDSC: 81157).

14

#### 15 *Mosaic analysis:*

16 We generated  $ptc^{S2}$  MARCM (Fig. 2P) clones by heat-shocking larvae 2 days after egg laying  
17 (AEL) at 37°C for 90 minutes. To generate one wild-type MARCM clone per lamina (Fig.  
18 S2B,C), we heat-shocked larvae (1 day AEL) for 60 minutes at 37°C. Finally, we induced  
19  $Dronc^{I24}$  MARCM clones (Fig. S4C) and  $Dronc^{I24}, UAS-Yan^{ACT}$  MARCM clones (Fig. S4D) by  
20 heat-shocking larvae (2 days AEL) for 120 minutes at 37°C. All MARCM crosses were raised at  
21 25°C until dissection at 0-5 hours APF.

22

#### 23 *Immunocytochemistry, in situ hybridization chain reaction, antibodies and microscopy:*

24 We dissected eye-optic lobe complexes from early pupae (0-5hrs APF) in 1X phosphate-buffered  
25 saline (PBS), fixed in 4% formaldehyde for 20 minutes, blocked in 5% normal donkey serum  
26 and incubated in primary antibodies diluted in block for 2 nights at 4°C. Samples were then  
27 washed in 1X PBS with 0.5% TritonX (PBSTx), incubated in secondary antibodies diluted in  
28 block, washed in PBSTx and mounted in SlowFade (Life Technologies).

29 When performing phospho-MAPK stains, dissections were performed in a phosphatase inhibitor  
30 buffer as detailed in<sup>50</sup>.

31

1 To detect *spi* transcripts by *in situ* hybridization chain reaction, we dissected, fixed and  
2 permeabilized the optic lobes as above before following the protocol described in<sup>51</sup>.

3  
4 We used the following primary antibodies in this study: mouse anti-Dac<sup>2-3</sup> (1:20, Developmental  
5 Studies Hybridoma Bank; DSHB), mouse anti-Repo (1:20, DSHB), rat anti-Elav (1:100, DSHB),  
6 mouse anti-Elav (1:20, DSHB), rabbit anti-Dcp-1 (1:100; Cell Signalling #9578), chicken anti-  
7 GFP (1:400; EMD Millipore), mouse anti-Svp (1:50, DSHB), rabbit anti-Slp2 (1:100; a gift from  
8 C. Desplan), rabbit-Bsh (1:500; a gift from C. Desplan), Rat anti-Pdm3 (1:1000; a gift from C.  
9 Desplan), guinea pig anti-Brp (1:100; a gift from C. Desplan), mouse anti-sim (1:20; a gift from  
10 T. Tabata), rabbit anti-Phospho-p44/42 MAPK (Erk1/2) (Thr202/Tyr204) (1:100, Cell Signaling  
11 #9101), chicken anti-RFP (1:500; Rockland #600-901-379s), mouse anti  $\beta$ -galactosidase (1:500;  
12 Promega # Z3781), chicken anti  $\beta$ -galactosidase (1:500; abcam #9361), rabbit-anti-GFP (1:500;  
13 Thermofisher #A6455), AlexaFluor405 conjugated Goat Anti-HRP (1:100; Jackson  
14 Immunolabs), AlexaFluor405-, Cy3-, or AlexaFluor647- conjugated Goat Anti-HRP (1:200;  
15 Jackson Immunolabs). Secondary antibodies were obtained from Jackson Immunolabs or  
16 Invitrogen and used at 1:800. Images were acquired using Zeiss 800 and 880 confocal  
17 microscopes with 40X objectives.

18

### 19 Quantification and Statistical analyses:

20 We used Fiji-ImageJ<sup>52</sup> or Imaris (version x64-9.5.1) to process and quantify confocal images as  
21 described below. We used Adobe Photoshop and Adobe Illustrator software to prepare figures.  
22 We used GraphPad Prism8 or JMP software to perform statistical tests. In all graphs, whiskers  
23 indicate the standard error of the mean (SEM).

24

### 25 *Dcp-1* quantifications:

26 We used the surfaces tool in Imaris to manually select the lamina region (based on Dac  
27 expression). We then used the spots tool to identify Dcp-1 positive cells (cell diameter = 5 $\mu$ m)  
28 within the selected region using the default thresholding settings, and plotted these values  
29 normalised to the volume of the selected lamina region in GraphPad Prism8.

30

### 31 *Cell-type* quantifications:

1 *LPCs per column*: Column number was identified by counting HRP-labelled photoreceptor axon  
2 bundles. We considered the youngest column located adjacent to the lamina furrow to be the first  
3 column, with column number (age) increasing towards the posterior (right) of the furrow. We  
4 counted the number of Dac<sup>+</sup> cells per column by quantifying 10 optical slices (step size = 1 μm)  
5 located centrally in the lamina.

6

7 *Control vs. Lamina<sup>ts</sup>>PntP1*: We quantified the lamina neuron subtypes per column using the  
8 following markers to identify L-neuron types: Elav<sup>+</sup> and Slp2<sup>+</sup> cells were counted as L1-L3s;  
9 Elav<sup>+</sup> and Bsh<sup>+</sup> cells were counted as L4s and Elav<sup>+</sup>, Bsh<sup>+</sup> and Slp2<sup>+</sup> cells were counted as  
10 L5s. We quantified 10 optical slices (step size = 1 μm) located centrally in the lamina. Column  
11 number was identified by counting HRP-labelled photoreceptor axon bundles. These  
12 quantifications were done blind.

13

14 *Ligand receptor screen*: We quantified the number of L5s based on Elav expression in the  
15 proximal lamina. Column number was identified by counting HRP-labelled photoreceptor axon  
16 bundles. We quantified 30 optical slices (step size = 1 μm) located centrally in the lamina.

17

18 *Ligand over-expression quantifications*: We quantified the number of L-neuron types per column  
19 using Elav, Bsh and Slp2. We quantified 30 optical slices (step size = 1 μm) located centrally in  
20 the lamina. Column number was identified by counting HRP-labelled photoreceptor axon  
21 bundles.

22

23 *Spi Probe Intensity Quantifications*:

24 In Fiji-ImageJ we used the free hand selection tool to draw a region of interest (ROI) around the  
25  $xg^O$  (marked by the  $xg^O > CD8::GFP$ ). We then measured the mean fluorescence intensity of *spi*  
26 transcripts labelled by HCR within each ROI. We quantified 30 optical slices (step size = 1 μm)  
27 located centrally in the lamina and then plotted the average for each optic lobe.

28

29 *Mean Fluorescence Intensity (MFI) quantifications and statistical analyses*:

30 Using Fiji-ImageJ, we selected the 10 most centrally located optical slices of the lamina (*ptc-*  
31 *lacZ*; Fig. S2D; step size = 1 μm) using photoreceptor axons (HRP), and the lobula plug (Dac



1 expression) as landmarks. We then obtained average intensity projections of these and generated  
2 MFI profile plots by measuring  $\beta$ -Gal MFI from the youngest lamina column to the oldest  
3 column for each of the 6 rows (distal-proximal cell positions) of the lamina.

4

5 We used a mixed effects linear model in JMP to test for an interaction between *ptc-lacZ* ( $\beta$ -Gal)  
6 Mean Fluorescence Intensity, distal-to-proximal cell position and Distance posterior to the first  
7 column (Summary Statistics are provided in Table S1). We used GraphPad Prism8 to apply a  
8 moving average of 6 neighbours to smooth the data, which are plotted in Fig. S2D.

9

10 *Number of  $xg^O$ :*

11 We quantified the number of  $xg^O$  (Fig. S3Q) by manually counting the number of Repo positive  
12 nuclei within LifeAct-GFP positive  $xg^O$  per 40 $\mu$ m optical section in Fiji-ImageJ. We used a step  
13 size of 1mm while acquiring the z-stacks and centred each 40 $\mu$ m optical section in the middle of  
14 the lamina using photoreceptor axons (HRP), and the lobula plug (Dac expression) as landmarks.  
15 Quantifications were performed blind.

16

17 *Length of  $xg^O$  processes:*

18 We quantified the lengths of the fine glial processes that extend distally from the  $xg^O$  towards the  
19 lamina plexus (Fig. S3O,P,R) by using the straight-line selection and measuring tools in Fiji-  
20 ImageJ to measure  $xg^O$  process lengths in a 10mm optical section centred in the middle of the  
21 lamina. Quantifications were performed blind.

22

23 *dpMAPK quantifications nuclear to cytoplasmic:*

24 Using Fiji we manually drew regions of interest (ROIs) with the free hand selection tool around  
25 the  $xg^O$  nucleus (based on Repo) and added these to the ROI manager. We then enlarged the  
26 ROIs (Edit>Selection>Enlarge) by 3.00 pixel units to include the cytoplasm. We then used the  
27 XOR function in the ROI Manager to only select the cytoplasm of the  $xg^O$ . We then measured  
28 the MFI of dpMAPK in the nucleus and the cytoplasm of the  $xg^O$  in 20 centrally located optical  
29 slices (corresponding to 20 $\mu$ m) for each optic lobe. We plotted the nuclear:cytoplasmic ratios of  
30 dpMAPK MFI in GraphPad Prism8.

31



1 *scRNAseq analyses:*

2       To maximize temporal resolution during development as well as the number of cells  
3 analysed, we combined three publicly available scRNAseq datasets of optic lobes from the  
4 following developmental timepoints: wandering third instar larva, 0 hours after puparium  
5 formation (APF), 12 hours APF, 15 hours APF and 24 hours APF. We combined these datasets  
6 using the Seurat v.3 integration pipeline to remove batch effects between libraries<sup>53</sup> as follows:  
7 Using the default parameters in Seurat 4.0.1 we first normalised each dataset with the  
8 `NormaliseData` function. Next, we extracted the 2000 most variable features with the  
9 `FindVariableFeatures` function. We then integrated the data using the `FindIntegrationAnchors`  
10 and `IntegrateData` functions. Next, we clustered the integrated dataset using the following  
11 functions: `ScaleData`, `RunPCA` (using 150 principal components as in<sup>54</sup>), `FindNeighbours` (80  
12 dimensions), `FindClusters` (resolution = 5), `RunUMAP`.

13       We annotated clusters corresponding to lamina cell types based on a combination of  
14 previous annotations from the source datasets<sup>20</sup> and known markers: *dac*, *eya*, *ill*, *gcm* for  
15 lamina precursor cells; *syp* and *slp2* for L1s; *slp2* for L2s; *erm* and *slp2* for L3s; *bsh* and  
16 *apterous* for L4s; *bsh* and *slp2* for L5s<sup>8,13,18,55–57</sup>.

17       To analyse differentially expressed genes between the L1-L4 and the L5 convergent tails,  
18 we first used the `CellSelector` function to manually select the two tails as two individual clusters.  
19 Next, we used the `FindMarkers` (two-sided Wilcox rank-sum test) function with default  
20 parameters to identify positively or negatively expressed genes based on log fold change. To  
21 visualise UMAPs and gene expression, we used the `DimPlot` and `FeaturePlot` functions.

22

## 23 **References**

- 24 1. Luo, L. & Flanagan, J. G. Development of Continuous and Discrete Neural Maps. *Neuron*  
25 **56**, 284–300 (2007).
- 26 2. Hidalgo, A. The control of cell number during central nervous system development in  
27 flies and mice. **120**, 1311–1325 (2003).
- 28 3. Miguel-aliaga, I. & Thor, S. Programmed cell death in the nervous system — a  
29 programmed cell fate? *Curr. Opin. Neurobiol.* **19**, 127–133 (2009).
- 30 4. Hadjieconomou, D., Timofeev, K. & Salecker, I. A step-by-step guide to visual circuit  
31 assembly in *Drosophila*. *Curr. Opin. Neurobiol.* **21**, 76–84 (2011).

- 1 5. Malin, J. & Desplan, C. Neural specification, targeting, and circuit formation during visual  
2 system assembly. *Proc. Natl. Acad. Sci.* **118**, e21018231182 (2021).
- 3 6. Treisman, J. E. Retinal differentiation in *Drosophila*. *Wiley Interdiscip. Rev. Dev. Biol.* **2**,  
4 545–557 (2013).
- 5 7. Fischbach, K.-F. & Dittrich, a P. The optic lobe of *Drosophila melanogaster*. I: A. Golgi  
6 analysis of wild-type structure. *Cell Tissue Res* **258**, 441–475 (1989).
- 7 8. Huang, Z. & Kunes, S. Hedgehog, transmitted along retinal axons, triggers neurogenesis  
8 in the developing visual centers of the *Drosophila* brain. *Cell* **86**, 411–22 (1996).
- 9 9. Huang, Z. *et al.* Signals transmitted along retinal axons in *Drosophila*: Hedgehog signal  
10 reception and the cell circuitry of lamina cartridge assembly. *Development* **125**, 3753–64  
11 (1998).
- 12 10. Sugie, A., Umetsu, D., Yasugi, T., Fischbach, K.-F. & Tabata, T. Recognition of pre- and  
13 postsynaptic neurons via nephrin/NEPH1 homologs is a basis for the formation of the  
14 *Drosophila* retinotopic map. *Development* **137**, 3303–3313 (2010).
- 15 11. Umetsu, D., Murakami, S., Sato, M. & Tabata, T. The highly ordered assembly of retinal  
16 axons and their synaptic partners is regulated by Hedgehog/Single-minded in the  
17 *Drosophila* visual system. *Development* **133**, 791–800 (2006).
- 18 12. Huang, Z., Shilo, B. Z. & Kunes, S. A retinal axon fascicle uses spitz, an EGF receptor  
19 ligand, to construct a synaptic cartridge in the brain of *Drosophila*. *Cell* **95**, 693–703  
20 (1998).
- 21 13. Tan, L. *et al.* Ig Superfamily Ligand and Receptor Pairs Expressed in Synaptic Partners in  
22 *Drosophila*. *Cell* **163**, 1756–1769 (2015).
- 23 14. Fernandes, V. M., Chen, Z., Rossi, A. M., Zipfel, J. & Desplan, C. Glia relay  
24 differentiation cues to coordinate neuronal development in *Drosophila*. *Science (80-. )*.  
25 **357**, 886–891 (2017).
- 26 15. Apitz, H. & Salecker, I. A challenge of numbers and diversity: neurogenesis in the  
27 *Drosophila* optic lobe. *J. Neurogenet.* **28**, 1–35 (2014).
- 28 16. Akagawa, H., Hara, Y., Togane, Y., Iwabuchi, K. & Hiraoka, T. The role of the effector  
29 caspases drICE and dcp-1 for cell death and corpse clearance in the developing optic lobe  
30 in *Drosophila*. *Dev. Biol.* 1–15 (2015). doi:10.1016/j.ydbio.2015.05.013
- 31 17. Fuchs, Y. & Steller, H. Programmed Cell Death in Animal Development and Disease. *Cell*

- 1           **147**, 742–758 (2011).
- 2   18.   Hasegawa, E., Kaido, M., Takayama, R. & Sato, M. Brain-specific-homeobox is required  
3           for the specification of neuronal types in the *Drosophila* optic lobe. *Dev. Biol.* **377**, 90–99  
4           (2013).
- 5   19.   Konstantinides, N. *et al.* A comprehensive series of temporal transcription factors in the  
6           fly visual system. *bioRxiv* 2021.06.13.448242 (2021).
- 7   20.   Özel, M. N. *et al.* Neuronal diversity and convergence in a visual system developmental  
8           atlas. *Nature* **589**, 88–95 (2020).
- 9   21.   Kurmangaliyev, Y. Z. *et al.* Transcriptional Programs of Circuit Assembly in the  
10          *Drosophila* Visual System. *Neuron* **108**, 1045–1057 (2020).
- 11   22.   Suzuki, T. *et al.* Formation of Neuronal Circuits by Interactions between Neuronal  
12          Populations Derived from Different Origins in the *Drosophila* Visual Center. *Cell Rep.* **15**,  
13          499–509 (2016).
- 14   23.   Chen, Y. & Struhl, G. Dual Roles for Patched in Sequestering and Transducing Hedgehog.  
15          **87**, 553–563 (1996).
- 16   24.   Biehs, B., Kechris, K., Liu, S. & Kornberg, T. B. Hedgehog targets in the *Drosophila*  
17          embryo and the mechanisms that generate tissue-specific outputs of Hedgehog signaling.  
18          *Development* **137**, 3887–3898 (2010).
- 19   25.   Albert, E. A., Puretskaia, O. A., Terekhanova, N. V & Labudina, A. Direct control of  
20          somatic stem cell proliferation factors by the *Drosophila* testis stem cell niche. **145**,  
21          dev156315 (2018).
- 22   26.   Busson, D. & Pret, A. GAL4/UAS Targeted Gene Expression for Studying *Drosophila*  
23          Hedgehog Signaling. *Methods Mol. Biol.* **397**, 161–201 (2007).
- 24   27.   Kalderon, D. The mechanism of hedgehog signal transduction. *Biochem. Soc. Trans.* **33**,  
25          1509–1512 (2005).
- 26   28.   Lee, T. & Luo, L. Mosaic analysis with a repressible cell marker (MARCM) for  
27          *Drosophila* neural development. *Trends Neurosci.* **24**, 251–4 (2001).
- 28   29.   Edwards, T. N., Nuschke, A. C., Nern, A. & Meinertzhagen, I. a. Organization and  
29          metamorphosis of glia in the *Drosophila* visual system. *J. Comp. Neurol.* **520**, 2067–2085  
30          (2012).
- 31   30.   Chotard, C. & Salecker, I. Glial cell development and function in the *Drosophila* visual

- 1 system. *Neuron Glia Biol.* **3**, 17–25 (2007).
- 2 31. Yogev, S., Schejter, E. D. & Shilo, B. Z. Polarized secretion of drosophila EGFR ligand  
3 from photoreceptor neurons is controlled by ER localization of the ligand-processing  
4 machinery. *PLoS Biol.* **8**, e1000505 (2010).
- 5 32. Sopko, R. & Perrimon, N. Receptor tyrosine kinases in Drosophila development. *Cold  
6 Spring Harb Perspect Biol.* **5**, a009050 (2013).
- 7 33. Freeman, M., Klämbt, C., Goodman, C. S. & Rubin, G. M. The argos gene encodes a  
8 diffusible factor that regulates cell fate decisions in the drosophila eye. *Cell* **69**, 963–975  
9 (1992).
- 10 34. Golembo, M., Schweitzer, R., Freeman, M. & Shilo, B. argos transcription is induced by  
11 the Drosophila EGF receptor pathway to form an inhibitory feedback loop. *Development*  
12 **230**, 223–230 (1996).
- 13 35. Jenett, A. *et al.* A GAL4-driver line resource for Drosophila neurobiology. *Cell Rep.* **2**,  
14 991–1001 (2012).
- 15 36. Placzek, M. & Briscoe, J. Sonic hedgehog in vertebrate neural tube development. *Int. J.  
16 Dev. Biol.* **62**, 225–234 (2018).
- 17 37. Sagner, A. & Briscoe, J. Establishing neuronal diversity in the spinal cord : a time and a  
18 place. *Development* **146**, dev182154 (2019).
- 19 38. Viktorin, G., Riebli, N. & Reichert, H. A multipotent transit-amplifying neuroblast lineage  
20 in the central brain gives rise to optic lobe glial cells in Drosophila. *Dev. Biol.* **379**, 182–  
21 194 (2013).
- 22 39. Ren, Q., Awasaki, T., Wang, Y., Huang, Y. & Lee, T. Lineage-guided Notch-dependent  
23 gliogenesis by Drosophila multi-potent progenitors. *Development* **145**, dev160127 (2018).
- 24 40. Franzdóttir, S. R. *et al.* Switch in FGF signalling initiates glial differentiation in the  
25 Drosophila eye. *Nature* **460**, 758–761 (2009).
- 26 41. Pinto-teixeira, F., Konstantinides, N. & Desplan, C. Programmed cell death acts at  
27 different stages of Drosophila neurodevelopment to shape the central nervous system.  
28 *FEBS Lett.* **590**, 2435–2453 (2016).
- 29 42. Yamaguchi, Y. & Miura, M. Review Programmed Cell Death in Neurodevelopment. *Dev.  
30 Cell* **32**, 478–490 (2015).
- 31 43. Davies, A. M. Regulation of neuronal survival and death by extracellular signals during

- 1 development. *EMBO J.* **22**, 2537–2545 (2003).
- 2 44. Ballif, B. A. & Blenis, J. Molecular Mechanisms Mediating Mammalian Mitogen-  
3 activated Protein Kinase (MAPK) Kinase (MEK)-MAPK Cell Survival Signals. *Cell*  
4 *Growth Differ.* **12**, 397–408 (2001).
- 5 45. Park, H. & Poo, M. M. Neurotrophin regulation of neural circuit development and  
6 function. *Nat. Rev. Neurosci.* **14**, 7–23 (2013).
- 7 46. Kurada, P. & White, K. Ras Promotes Cell Survival in *Drosophila* by Downregulating hid  
8 Expression. **95**, 319–329 (1998).
- 9 47. Bergmann, A., Agapite, J., McCall, K. & Steller, H. The *Drosophila* gene hid is a direct  
10 molecular target of Ras-dependent survival signaling. *Cell* **95**, 331–41 (1998).
- 11 48. Bergmann, A., Tugentman, M., Shilo, B. Z. & Steller, H. Regulation of cell number by  
12 MAPK-dependent control of apoptosis: A mechanism for trophic survival signaling. *Dev.*  
13 *Cell* **2**, 159–170 (2002).
- 14 49. Zang, Y. *et al.* Plasma membrane overgrowth causes fibrotic collagen accumulation and  
15 immune activation in *Drosophila* adipocytes. *Elife* **4**, e07187 (2015).
- 16 50. Amoyel, M., Anderson, J., Suisse, A., Glasner, J. & Bach, E. A. Socs36E Controls Niche  
17 Competition by Repressing MAPK Signaling in the *Drosophila* Testis. *PLoS Genet.* **12**,  
18 e1005815 (2016).
- 19 51. Duckhorn, J. C., Junker, I., Ding, Y. & Shirangi, T. R. Combined in situ hybridization  
20 chain reaction and immunostaining to visualize gene expression in whole-mount  
21 *Drosophila* central nervous. *bioRxiv* 2021.08.02.454831 (2021).
- 22 52. Schindelin, J. *et al.* Fiji : an open-source platform for biological-image analysis. *Nat*  
23 *Methods* **9**, 676–682 (2012).
- 24 53. Stuart, T. *et al.* Comprehensive Integration of Single-Cell Data Resource Comprehensive  
25 Integration of Single-Cell Data. *Cell* **177**, 1888-1902.e21 (2019).
- 26 54. Konstantinides, N. *et al.* A comprehensive series of temporal transcription factors in the  
27 fly visual system. *bioRxiv* **06**, 448242 (2021).
- 28 55. Chotard, C., Leung, W. & Salecker, I. glial cells missing and gcm2 cell autonomously  
29 regulate both glial and neuronal development in the visual system of *Drosophila*. *Neuron*  
30 **48**, 237–251 (2005).
- 31 56. Guillermin, O., Perruchoud, B., Sprecher, S. G. & Egger, B. Characterization of Tailless

1 functions during drosophila optic lobe formation. *Dev. Biol.* **405**, 202–213 (2015).  
2 57. Piñeiro, C., Lopes, C. S. & Casares, F. A conserved transcriptional network regulates  
3 lamina development in the Drosophila visual system. *Development* **141**, 2838–47 (2014).  
4

#### 5 **Acknowledgements:**

6 We thank C. Desplan, A. Gould, D. Kalderon, B. Shilo, G. Stuhl and J. Treisman for reagents,  
7 and S. Ackerman, M. Amoyel, B. Conradt, C. Desplan, C. Doe, A. Franz, P. Salinas, A. Rossi, C.  
8 Stern, L. Venkatasubramanian and members of the Amoyel and Fernandes labs for comments on  
9 the manuscript. Stocks obtained from the Bloomington Drosophila Stock Center (NIH  
10 P40OD018537) were used in this study. Monoclonal antibodies obtained from the  
11 Developmental Studies Hybridoma Bank, created by the NICHD of the NIH and maintained at  
12 The University of Iowa, were used in this study.  
13

#### 14 **Funding:**

15 Wellcome Trust Sir Henry Dale Research Fellowship 210472/Z/18/Z (VMF), UCL Overseas  
16 Research Scholarship (ARP) and UCL Graduate Research Scholarship (ARP).  
17

#### 18 **Author contributions:**

19 Conceptualization: VMF, ARP, MPB  
20 Investigation: ARP, MPB, ILB, ZH, VMF  
21 Supervision: VMF  
22 Writing – original draft: VMF  
23 Writing – review & editing: ARP, MPB, ILB  
24

#### 25 **Competing interests:**

26 The authors declare no competing interests.



1 **Fig. 1**

2

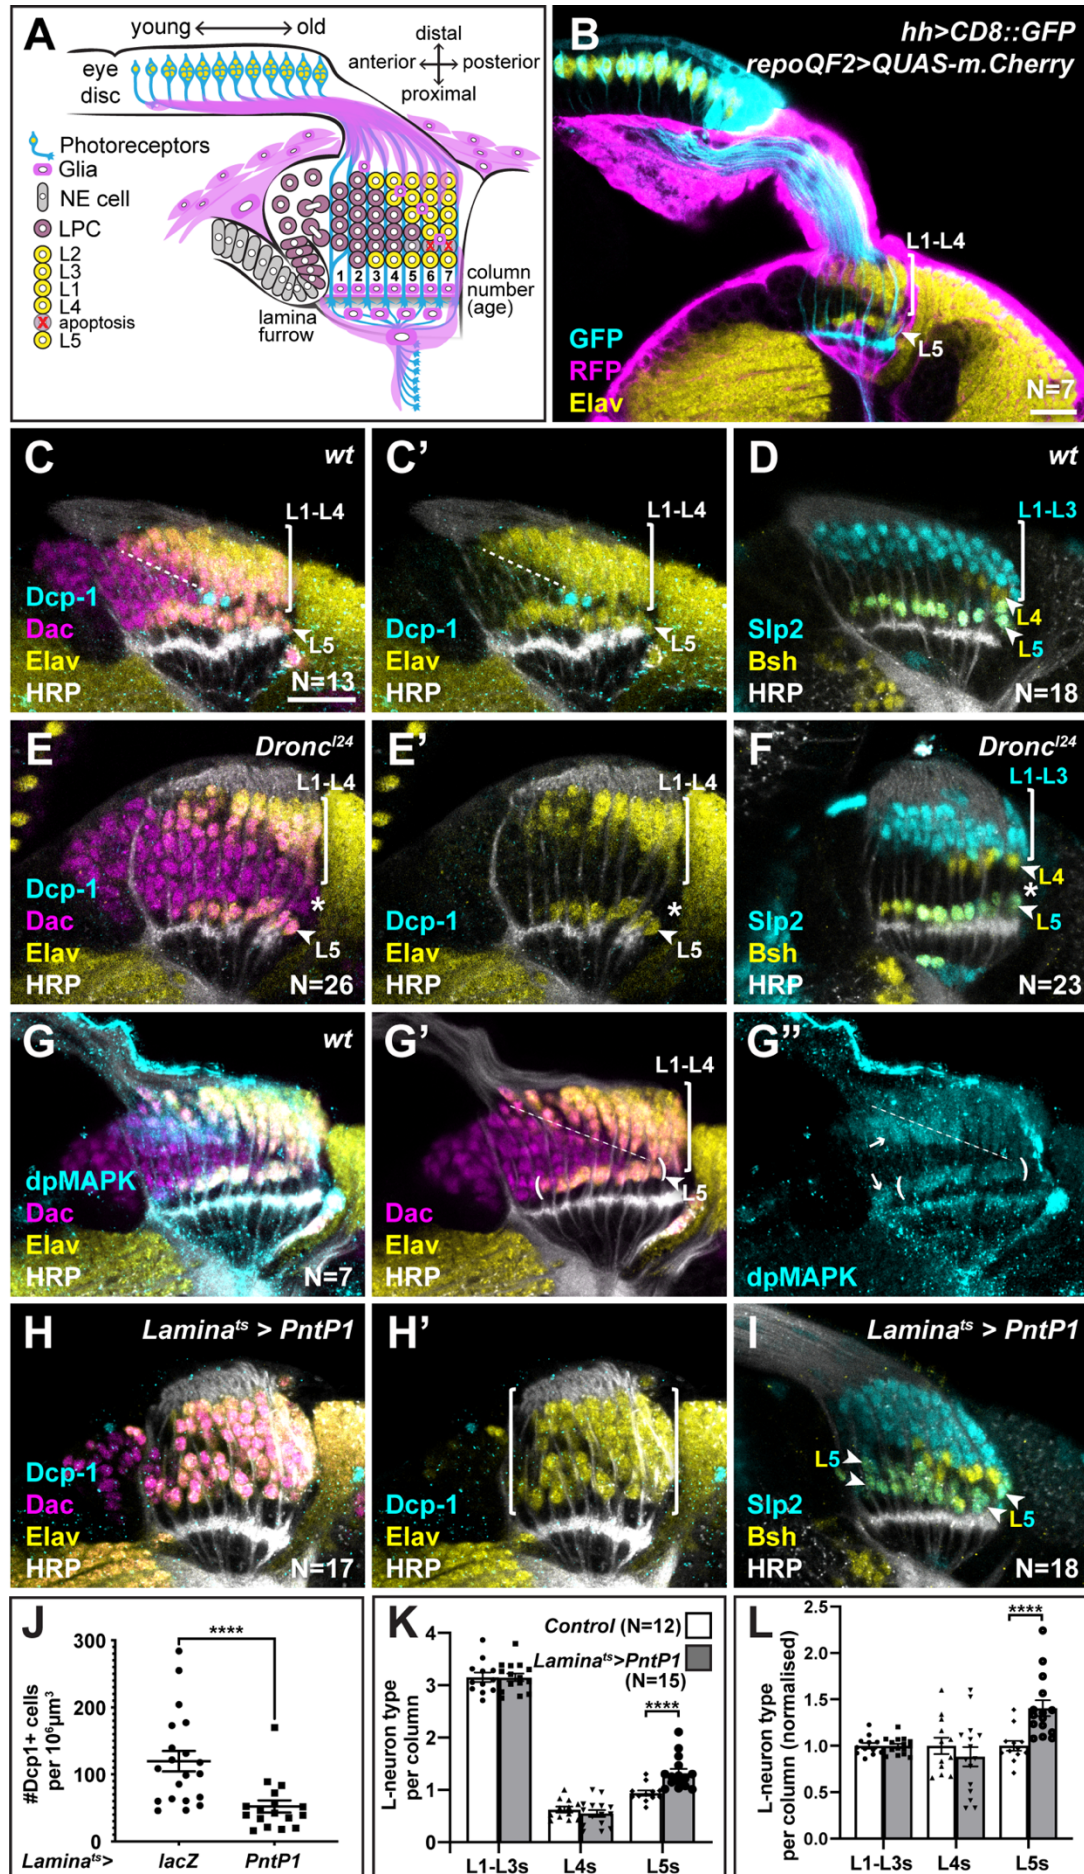



1 **Fig. 1: The ‘extra’ LPCs are specified as L5s**  
2 **(A)** Schematic of the developing lamina. Photoreceptors (blue) drive lamina precursor cell (LPC;  
3 purple) birth from neuroepithelial cells (NE; grey) and their assembly into columns of ~6 LPCs,  
4 which differentiate into the L1-L5 neurons (yellow) following an invariant spatiotemporal  
5 pattern. The ‘extra’ LPC is cleared by apoptosis (red X). Several glial types (magenta) associate  
6 with the lamina. **(B)** A cross-sectional view of an early pupal (0-5 hours APF) optic lobe where  
7 *hh-Gal4* drives *UAS-CD8::GFP* expression in photoreceptors (cyan). The pan-glial driver *repo-*  
8 *QF2* drives *QUAS-m.Cherry* (magenta) in all glia. Elav (yellow) marks all neurons. **(C,D)** Wild-  
9 type optic lobes stained for **(C)** Dac (lamina cell bodies; magenta), Horseradish peroxidase  
10 (photoreceptor axons; HRP; white), Elav (neurons; yellow) and cleaved Dcp-1 (apoptotic cells;  
11 cyan). Dcp-1 positive cells are located between L1-L4s and L5s and correspond to the ‘extra’  
12 LPCs, which are being eliminated. **(D)** HRP (white) and L-neuron subtype specific markers Slp2  
13 (cyan) and Bsh (yellow), which individually mark L1-L3 and L4s respectively, and are co-  
14 expressed in L5s. **(E,F)** *Dronc<sup>l24</sup>* optic lobes stained for the same markers as in (C) and (D),  
15 respectively. **(E)** No Dcp-1 positive cells were recovered and Dac positive cells between L1-L4s  
16 and L5s persisted into the oldest columns. **(F)** A space (negative for both markers; asterisk) was  
17 present between L4s and L5s. **(G)** Wild-type optic lobes stained for Dac (magenta), HRP  
18 (white), Elav (yellow) and dpMAPK (cyan). dpMAPK levels were high (arrows in G”) just prior  
19 to Elav expression (dashed line for the front of L1-L4 differentiation and brackets for L5  
20 differentiation). **(H,I)** Optic lobes with lamina-specific overexpression of PntP1 stained as in (C)  
21 and (D), respectively. **(H)** Fewer Dcp-1 positive cells were recovered compared with controls. **(I)**  
22 Roughly two rows of Slp2 and Bsh co-expressing cells (L5s) were recovered (arrow heads). **(J)**  
23 Quantification of the number of Dcp-1 positive cells in (H) compared with control  
24 *Lamina<sup>ts</sup>>lacZ* (Figure S1A) ( $P < 0.0001$ ; Mann-Whitney U test; error bars indicate standard error  
25 of the mean; SEM). **(K)** Quantification of the number of L-neuron types per column based on  
26 Slp2 and Bsh expression from column 7 onwards shows an increase in the number of  
27 L5s/column in *Lamina<sup>ts</sup>>PntP1* compared with controls;  $P < 0.0001$ ; Mann-Whitney U test. **(L)**  
28 Same as (K) but normalised to the mean of the control. The number of L5s/column in  
29 *Lamina<sup>ts</sup>>PntP1* increase ~1.4 fold relative to controls;  $P < 0.0001$ ; Mann-Whitney U test. Error  
30 bars indicate SEM. Ns indicated in parentheses for J,K. Scale bar = 20 $\mu$ m.

1 Fig. 2

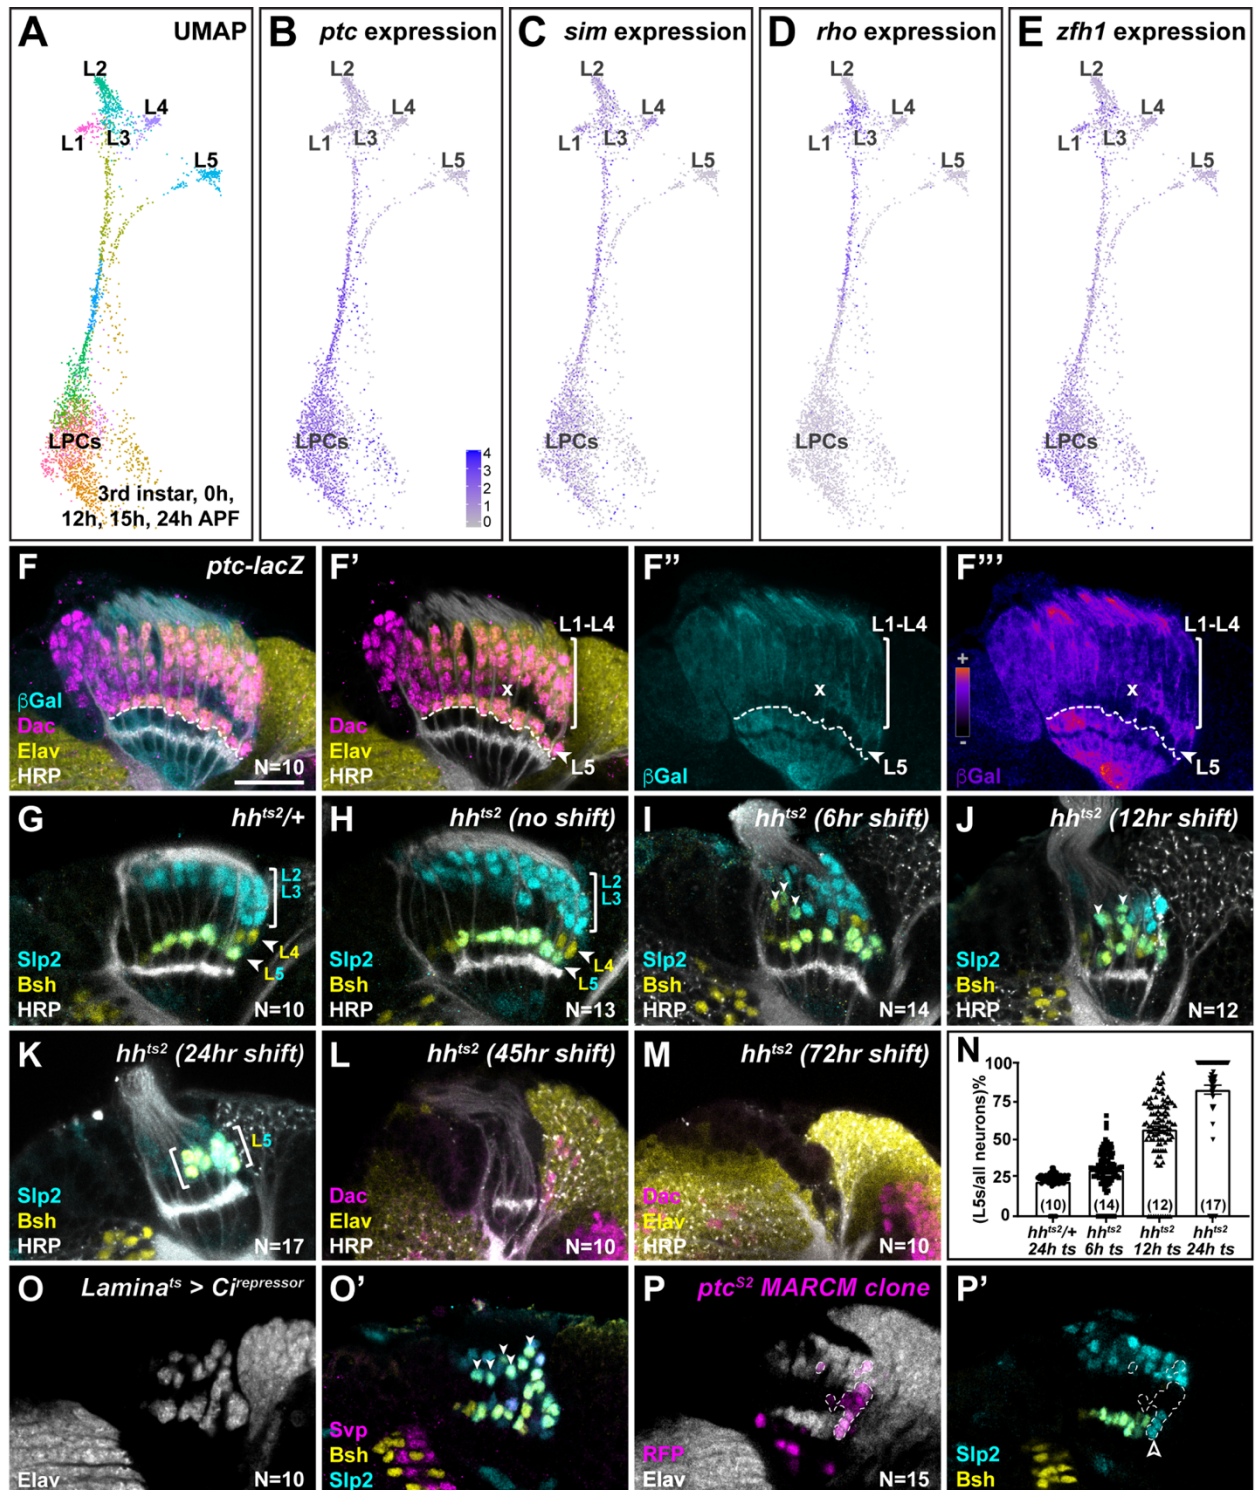

2

1 **Fig. 2: Hh signalling patterns LPCs**  
2 **(A)** UMAP visualisation of LPCs, differentiated L1-L5 neurons and intermediate stages of  
3 differentiation using 150 principal components calculated on the log-normalized integrated gene  
4 expression from single-cell RNA sequencing datasets of the third larval instar, 0 hours-, 12  
5 hours-, 15 hours- and 24 hours-APF<sup>19-21</sup>. See Figure S2A for full integrated dataset. **(B-E)**  
6 UMAP visualisation from (A; grey) showing log normalised expression of the Hh signalling  
7 targets (blue): **(B)** *ptc*, **(C)**, *sim*, **(D)** *rho* and **(E)** *zfh1*, which all show higher levels of expression  
8 in the convergent tail connecting the LPC cluster with mature L1-L4 neuron clusters rather than  
9 the tail connecting the LPC cluster with the L5 neuron cluster. **(F)** An optic lobe expressing *ptc-*  
10 *LacZ* stained for  $\beta$ -Galactosidase ( $\beta$ -Gal; cyan), Dac (magenta), Elav (yellow) and HRP (white).  
11 **(F'')** shows (F'') in pseudo-colour. Dashed line marks the most proximal surface of the lamina.  
12 "x" marks the point from which the 'extra' LPCs have been cleared. In young columns,  $\beta$ -Gal  
13 expression decreases along the distal to proximal axis, being lowest in the proximal lamina. L5s  
14 have the lowest levels of  $\beta$ -Gal, which eventually decreases in older L1-L4s; quantified in Figure  
15 S2D with summary statistics in Table S2. **(G-K)** HRP (white) and lamina neuron subtype  
16 specific markers Slp2 (cyan) and Bsh (yellow) from: **(G)** *hh<sup>ts2/+</sup>* shifted from the permissive  
17 temperature (18°C) to the restrictive temperature (29°C) for 24 hours, **(H)** *hh<sup>ts2</sup>* raised at the  
18 permissive temperature, **(I-K)** *hh<sup>ts2</sup>* shifted from the permissive temperature to the restrictive  
19 temperature for **(I)** 6 hours, **(J)** 12 hours, **(K)** *hh<sup>ts2</sup>* 24 hours. **(I-K)** The pattern of neuronal  
20 differentiation worsened progressively with longer temperature shifts, with fewer neurons  
21 differentiating overall (quantified in Figure S2F). Slp2 and Bsh positive cells (L5s) were  
22 observed in the distal lamina (arrowheads), till most cells present differentiated into L5 neurons  
23 for the 24 hour temperature shift. **(L,M)** *hh<sup>ts2</sup>* shifted from the permissive temperature to the  
24 restrictive temperature for **(L)** 45 hours and **(M)** 72 hours stained for Dac (magenta), Elav  
25 (yellow) and HRP (white). A few photoreceptor bundles are present but no LPCs formed under  
26 the **(L)** 45 hour temperature shift condition, whereas neither photoreceptors nor LPCs were  
27 present for the **(M)** 72 hour temperature shift condition. **(N)** Quantification of the percentage of  
28 neurons that differentiated as L5s for (G, I-K). Ns indicated in parentheses. Error bars indicate  
29 SEM. **(O)** Lamina-specific misexpression of *Ci<sup>repressor</sup>* stained for **(O)** Elav (white) and **(O')** L-  
30 neuron subtype specific markers Slp2 (cyan), Bsh (yellow) and Svp (which is expressed in L1s;  
31 magenta). Fewer L-neurons were observed and the pattern of neuronal differentiation was

1 perturbed. As well, Slp2 and Bsh co-expressing cells (L5s) were recovered in the distal lamina  
2 (arrowheads). **(P)** An optic lobe with RFP positive *ptc<sup>S2</sup>* MARCM clones stained for **(P)** Elav  
3 (white) and RFP (magenta) **(P')** Slp2 (cyan) and Bsh (yellow). Clones in the lamina are outlined  
4 by dashed lines. A clone that spanned the proximal lamina was still Elav and Slp2 positive but  
5 lacked Bsh, indicating that the cells had differentiated into L1s, L2s or L3s but not L4s or L5s.  
6 Scale bar = 20 $\mu$ m.



1 **Fig. 3**

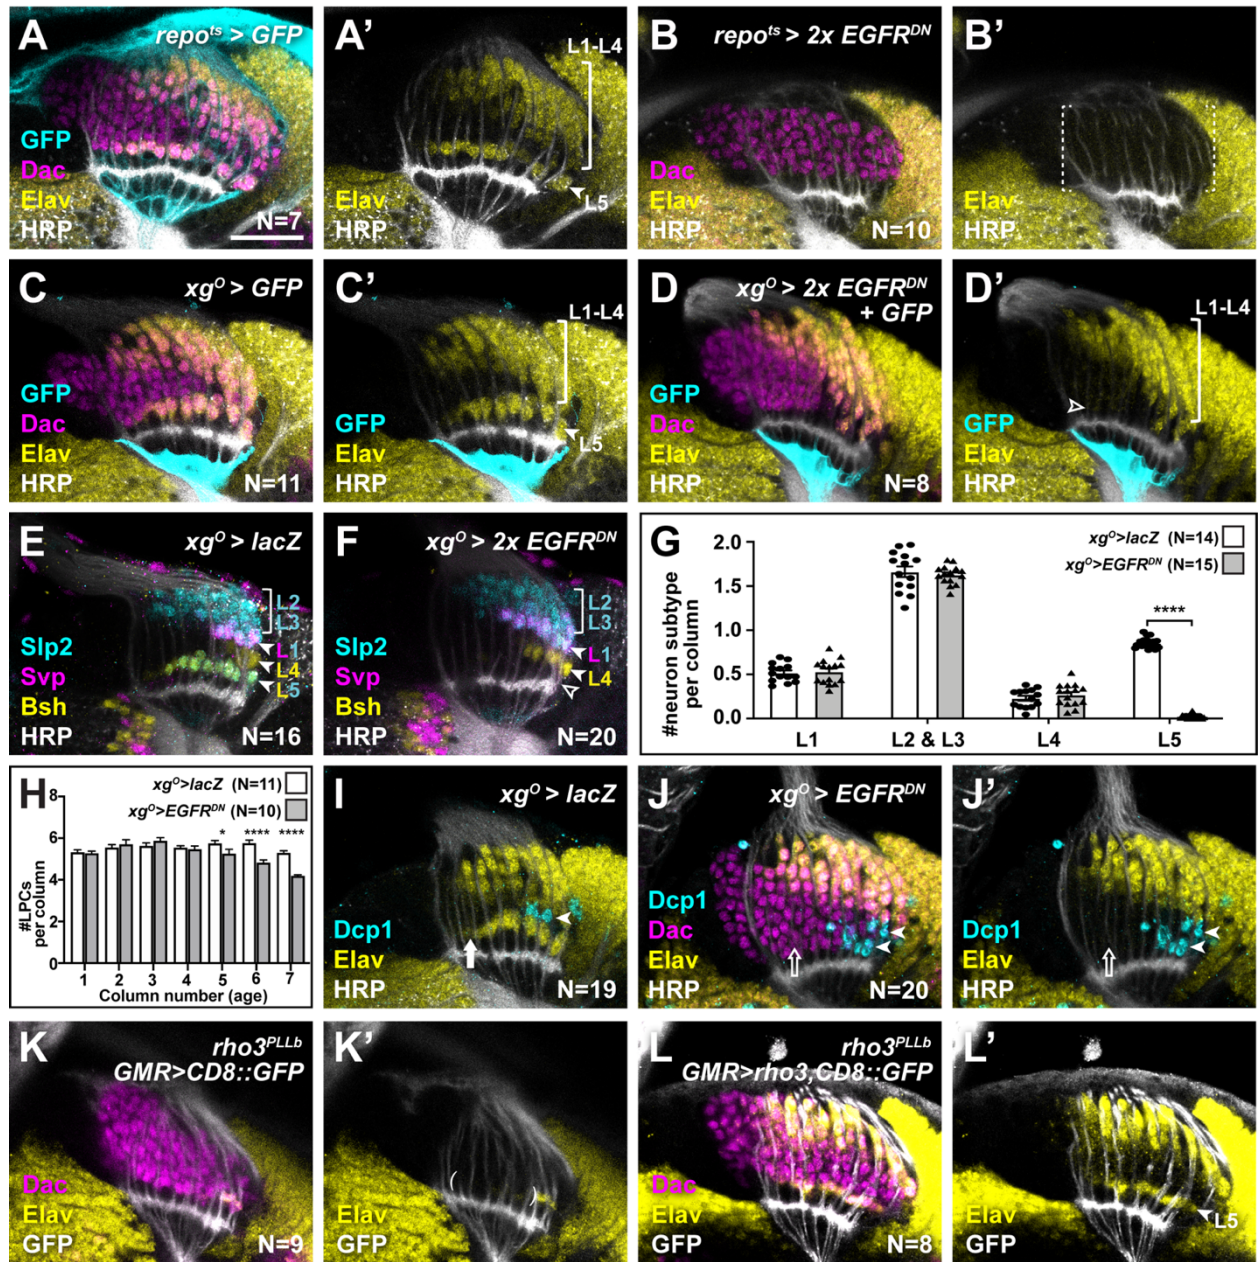

2

1 **Fig. 3: Outer chiasm giant glia induce L5 neuronal differentiation in response to EGF from**  
2 **photoreceptors**

3 **(A)** A cross-sectional view of an optic lobe with pan-glial expression of CD8::GFP stained for  
4 GFP (cyan), Dac (magenta), Elav (yellow) and HRP (white). **(B)** Pan-glial expression of 2 copies  
5 of EGFR<sup>DN</sup> stained for Dac (magenta), Elav (yellow) and HRP (white). Although LPCs (Dac+  
6 cells) formed, they did not differentiate (lack of Elav+ cells). **(C)** *xg*<sup>O</sup>-specific expression of  
7 CD8::GFP stained for GFP (cyan), Dac (magenta), Elav (yellow) and HRP (white). **(D)** *xg*<sup>O</sup>-  
8 specific expression of 2 copies of EGFR<sup>DN</sup> and CD8::GFP stained for GFP (cyan), Dac  
9 (magenta), Elav (yellow) and HRP (white). The number of Elav+ cells in proximal row (L5s)  
10 was decreased (empty arrowhead). **(E,F)** HRP (white) and L-neuron subtype specific markers  
11 Slp2 (cyan), Bsh (yellow) and Svp (magenta) in **(E)** Control *xg*<sup>O</sup>>*lacZ* optic lobe and **(F)**  
12 *xg*<sup>O</sup>>*2xEGFR*<sup>DN</sup>. The number of cells co-expressing Slp2 and Bsh (L5s) was reduced. **(G)**  
13 Quantification of the number of L-neuron subtypes per column for control and *xg*<sup>O</sup>>*2xEGFR*<sup>DN</sup>.  
14 Only L5 neurons were decreased significantly ( $P^{L5} < 0.0001$ ; Mann-Whitney U test. Error bars  
15 indicate SEM. Ns indicated in parentheses). **(H)** Quantification of the number of LPCs/column  
16 (*i.e.* Dac+ cells/column) for control and *xg*<sup>O</sup>>*2xEGFR*<sup>DN</sup> showed that a significant decrease was  
17 observed only from column 5 onwards ( $P^* < 0.05$ ,  $P^{****} < 0.0002$ ; Mann-Whitney U test. Error  
18 bars indicate SEM. Ns indicated in parentheses). **(I)** Control *xg*<sup>O</sup>>*lacZ* optic lobe stained for  
19 Dcp-1 (cyan), Elav (yellow) and HRP (white). Dcp-1+ cells were always observed just distal to  
20 the most proximal row of cells (L5s). **(J)** *xg*<sup>O</sup>>*EGFR*<sup>DN</sup> stained for Dcp-1 (cyan), Dac (magenta)  
21 Elav (yellow) and HRP (white). Dcp-1 positive cells were observed in the most proximal row of  
22 LPCs as well as the row just distal to these, starting from column  $5.93 \pm 0.18$ SEM. **(K)** GMR-  
23 Gal4 driven CD8::GFP expression in photoreceptors in a *rho3*<sup>PLLb</sup> background stained for GFP  
24 (white), Dac (magenta), Elav (yellow). Few proximal Elav+ cells (L5s) were recovered in older  
25 columns only as previously published<sup>14</sup>. **(L)** GMR-Gal4 driven Rho3 and CD8::GFP in a  
26 *rho3*<sup>PLLb</sup> background stained for GFP (white), Dac (magenta), Elav (yellow) showed that L5  
27 neuronal differentiation was rescued (Elav+ cells in the proximal lamina). Scale bar = 20µm.



1 Fig. 4

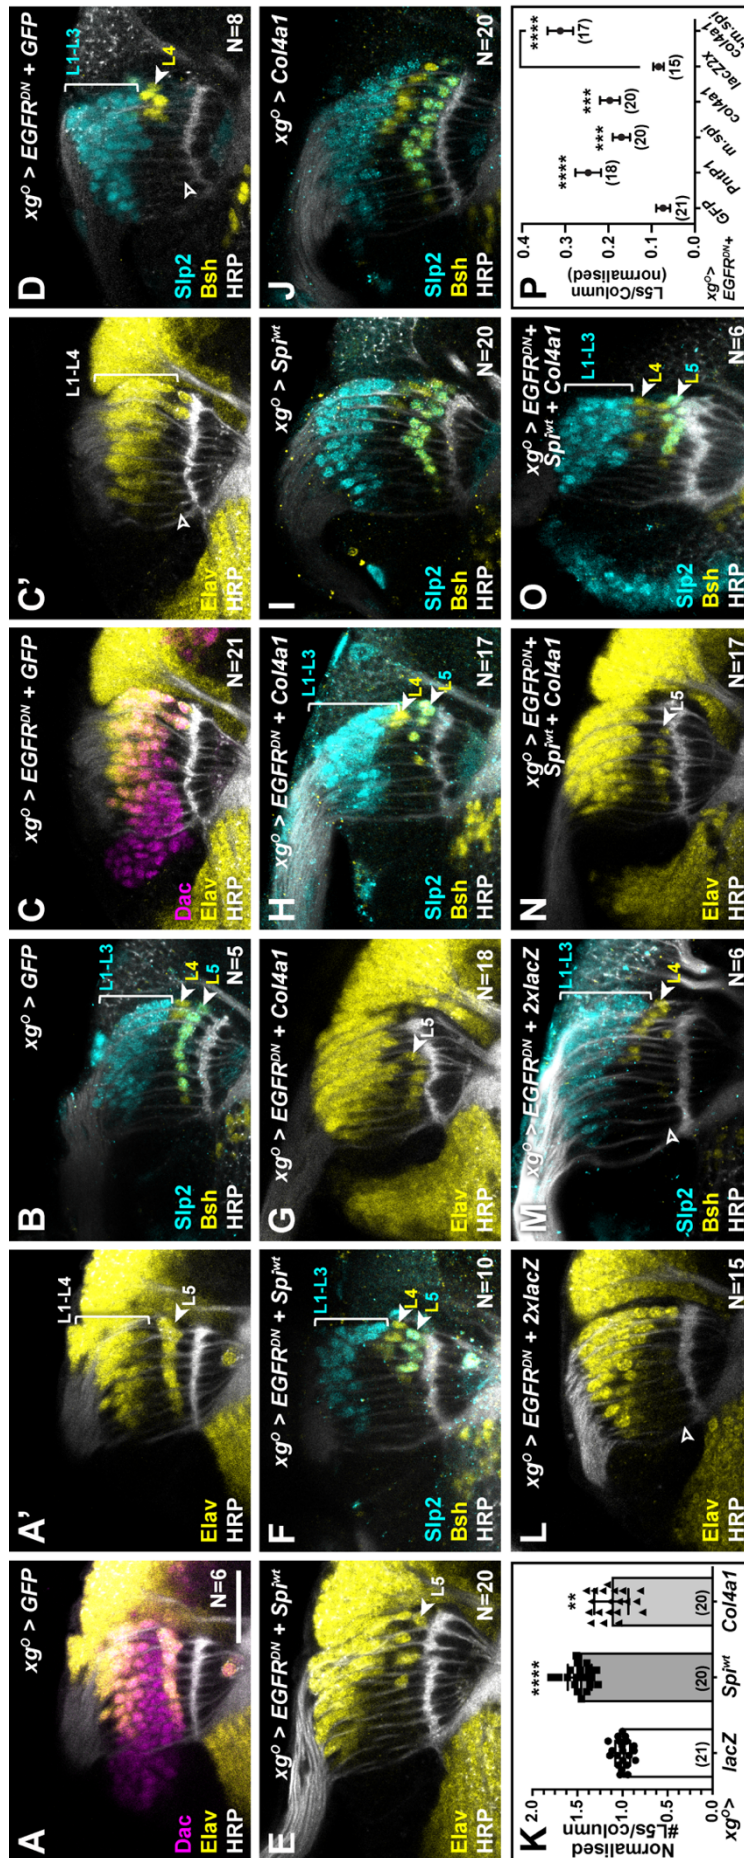



1 **Fig. 4: Xg<sup>O</sup> secrete multiple ligands to induce L5 neuronal differentiation**  
2 **(A,B)** Control  $xg^O > GFP$  optic lobes. **(A)** Dac (magenta), Elav (yellow) and HRP (white) or **(B)**  
3 HRP (white) and L-neuron specific markers Slp2 (cyan) and Bsh (yellow). **(C,D)** Gal4 titration  
4 control  $xg^O > GFP + EGFR^{DN}$  **(C)** Dac (magenta), Elav (yellow) and HRP (white). Elav+ cells  
5 were reduced in number in the proximal lamina. **(D)** HRP (white) and L-neuron specific markers  
6 Slp2 (cyan) and Bsh (yellow). The number of Slp2 and Bsh co-expressing cells was reduced.  
7 **(E,F)** Wild-type Spi (Spi<sup>wt</sup>) co-expression with EGFR<sup>DN</sup> specifically in  $xg^O$ . **(E)** stained for Elav  
8 (yellow) and HRP (white). Some Elav+ cells were recovered in the proximal lamina **(F)** HRP  
9 (white) and L-neuron specific markers Slp2 (cyan) and Bsh (yellow). Slp2 and Bsh co-  
10 expressing cells were recovered in the proximal lamina. **(G,H)** Col4a1 co-expression with  
11 EGFR<sup>DN</sup> specifically in  $xg^O$ . **(G)** stained for Elav (yellow) and HRP (white). Some Elav+ cells  
12 were recovered in the proximal lamina **(H)** HRP (white) and L-neuron specific markers Slp2  
13 (cyan) and Bsh (yellow). Slp2 and Bsh co-expressing cells were recovered in the proximal  
14 lamina. **(I,J)** Optic lobes stained for Slp2 and Bsh when  $xg^O$  overexpress **(I)** Spi<sup>wt</sup> or **(J)** Col4a1.  
15 In both instances, ectopic Slp2 and Bsh co-expressing cells (L5s) are recovered in the proximal  
16 lamina. **(K)** Quantification of the number of L5s/column from (I-J) normalised to the control  
17  $xg^O > lacZ$ . ( $P^{spi.wt} < 0.0001$ ;  $P^{Col4a1} < 0.01$ ; Mann-Whitney U test. Error bars indicate SEM. Ns  
18 indicated in parentheses). **(L,M)** Gal4 titration control  $xg^O > EGFR^{DN} + 2xlacZ$  stained for **(L)**  
19 Elav (yellow) and HRP (white) or **(M)** HRP (white), Slp2 (cyan) and Bsh (yellow). **(N,O)** Wild-  
20 type Spi<sup>wt</sup> and Col4a1 co-expression with EGFR<sup>DN</sup> specifically in  $xg^O$ . **(N)** stained for Elav  
21 (yellow) and HRP (white). Elav+ cells were recovered in the proximal lamina **(O)** HRP (white)  
22 and L-neuron specific markers Slp2 (cyan) and Bsh (yellow). Slp2 and Bsh co-expressing cells  
23 were recovered in the proximal lamina. **(P)** Quantification of the number of L5s/column for the  
24 genotypes indicated normalised to the appropriate titration control  $xg^O > lacZ$ . ( $P^{***} < 0.0005$ ;  
25  $P^{****} < 0.0001$ ; Mann-Whitney U test. Error bars indicate SEM. Ns indicated in parentheses).  
26 Scale bar = 20µm.

1 Fig. 5

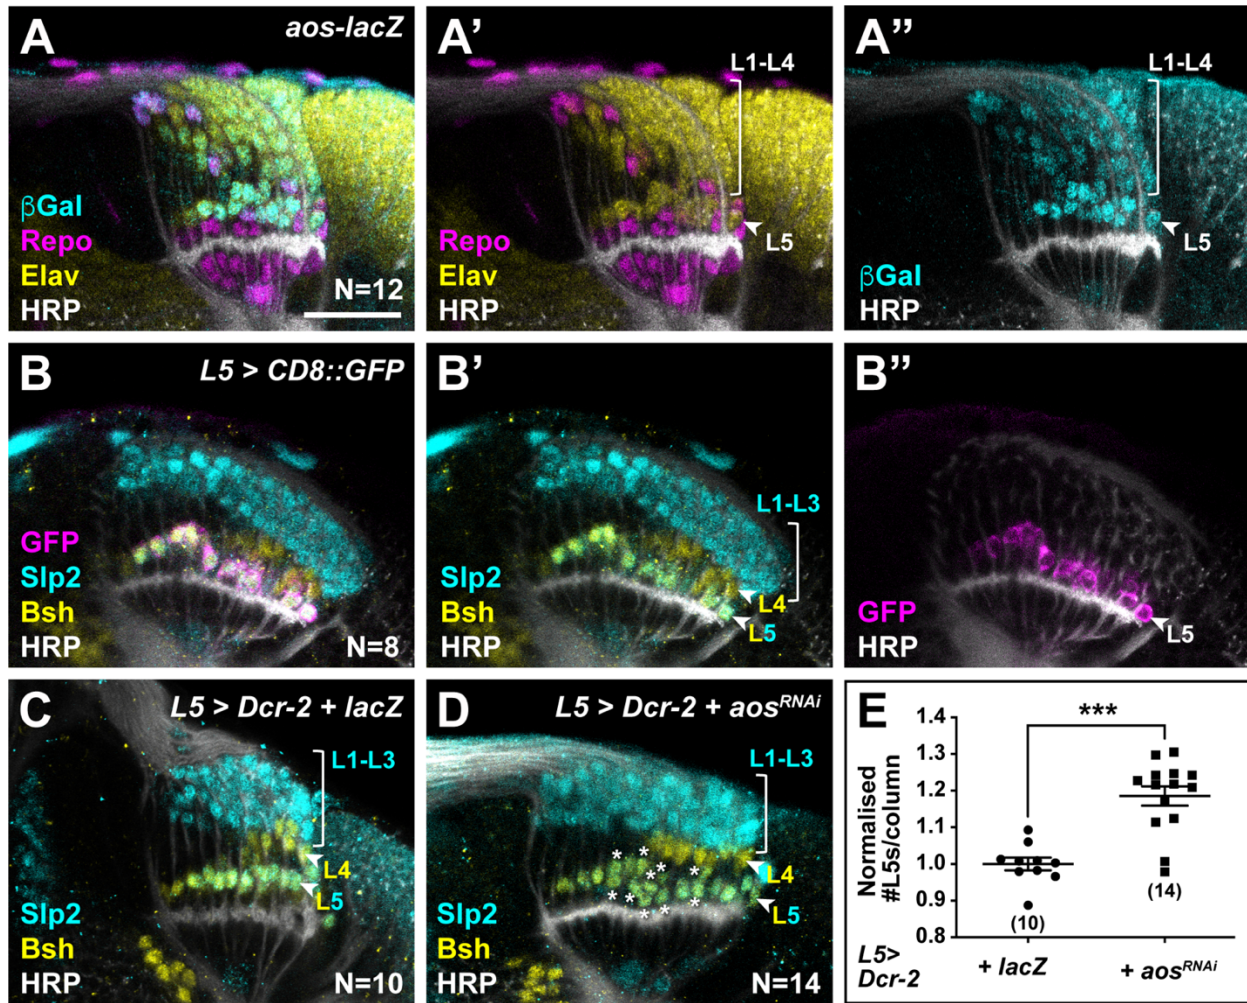

2

1 **Fig. 5: Newly-induced L5 neurons secrete Aos to limit inductive signals from  $xg^O$**   
2 **(A)** *aos-lacZ* expression in the lamina with  $\beta$ -Gal (cyan), Repo (magenta), Elav (yellow), HRP  
3 (white). The highest levels of  $\beta$ -Gal expression were observed in proximal LPCs (L5s). Ectopic  
4 Elav<sup>+</sup> cells were observed in the proximal lamina. **(B)** An L5-specific Gal4 was used to drive  
5 GFP (magenta) expression in the lamina; HRP (white) and L-neuron subtypes Slp2 (cyan) and  
6 Bsh (yellow). GFP was observed specifically in Slp2 and Bsh co-expressing cells (L5s) with low  
7 levels in the youngest neurons. **(C,D)** Optic lobes stained for HRP (white), Slp2 (cyan) and Bsh  
8 (yellow) in **(C)** Control *L5>Dcr-2+lacZ* and **(D)** when Dcr-2 and *aos<sup>RNAi</sup>* were expressed in  
9 developing L5 neurons specifically, which led to an increase in the number of Slp2 and Bsh co-  
10 expressing cells (L5s). **(E)** Quantification of the number of L5s/column normalised for **(D)** and  
11 **(E)** normalised to control **(D)**. (P\*\*\*<0.0005; Mann-Whitney U test. Error bars indicate SEM.  
12 Ns indicated in parentheses). Scale bar = 20 $\mu$ m.

1 Fig. 6

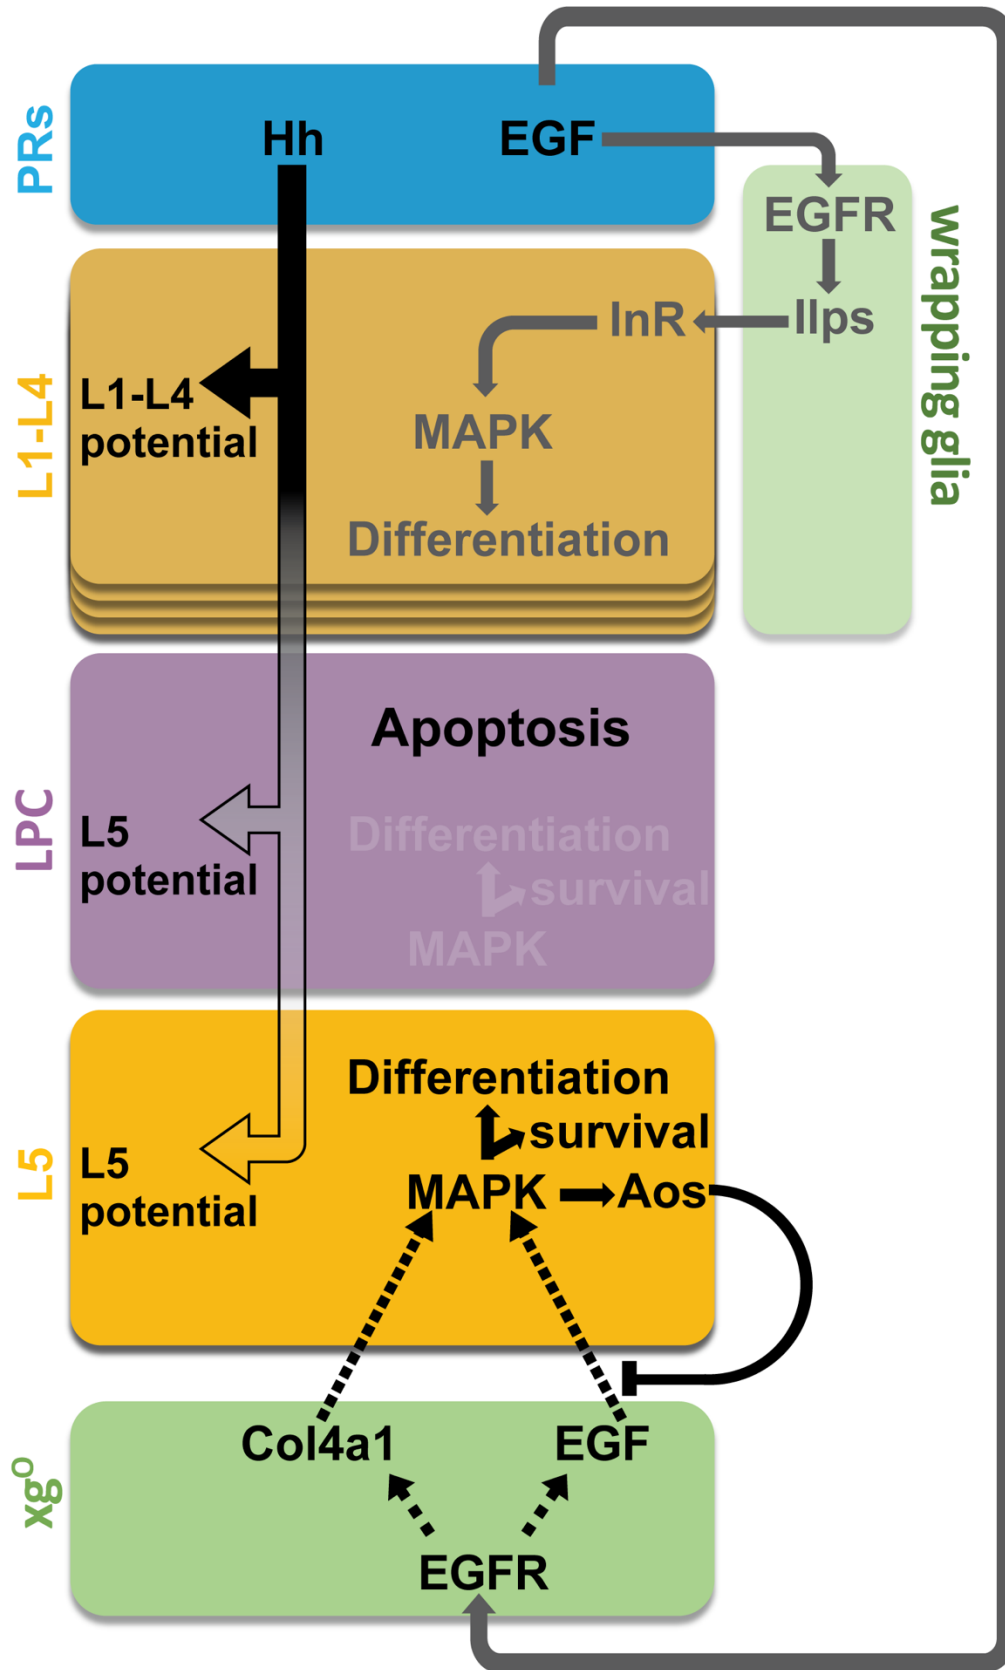

1 **Fig. 6: Summary schematic of neuronal differentiation in the lamina**

2 In our model of lamina neuronal differentiation, differential Hh signalling along the distal-  
3 proximal length of lamina columns specifies neuronal identity such that cells with high Hh  
4 signalling activity take on distal neuronal identities while those with low Hh signalling levels  
5 take on proximal neuronal identity. EGF from photoreceptors activates EGFR signalling in  
6 wrapping glia, which induce L1-L4 differentiation, and in  $xg^O$ , which induce L5 differentiation.  
7 Only a subset of the LPCs specified as L5s differentiate (*i.e.* those in the proximal row). We  
8 propose that this selective neuronal induction of L5s is due to tissue architecture and feedback  
9 from the newly born L5s, which limit available EGF (Spi) by secreting the antagonist Aos.
