# Supplementary material for: Differentiation signals from glia are fine-tuned to set neuronal numbers during development
Source: bioRxiv preprint, doi:10.1101/2021.12.13.472383, version 3 (2022-09-05)
Supplement: Supplementary File 1 [file 472383_file03.docx]

**Supplementary File 1: Table 1 summarising the results from the glial-Gal4 screen (Figure 1 B,C, Figure 1- figure supplement 1B-N) to identify the glial type that regulates L5 development.**

| ***Glial-type > EGFRDNx2*** | **Elav+ cells in the proximal lamina** |
| --- | --- |
| Pan-glia | Absent or reduced |
| Perineurial glia | Present |
| Sub-perineurial glia | Present |
| Cortex glia | Present |
| Epithelial glia and Marginal glia (eg + mg) | Present |
| Wrapping glia and xgouter (xgO) | Absent or reduced |
| xgO +xginner | Absent or reduced |
| xgO | Absent or reduced |
| xgOts | Absent or reduced |
