# Supplementary material for: Differentiation signals from glia are fine-tuned to set neuronal numbers during development
Source: bioRxiv preprint, doi:10.1101/2021.12.13.472383, version 3 (2022-09-05)
Supplement: Supplementary File 2 [file 472383_file04.docx]

**Supplementary File 2: Table listing all genotypes and experimental conditions used by figure panel.** (Note that only female genotypes are listed though both sexes were included in our analyses)

| **Figure** | **Panel** | **Genotype** | **Conditions** |
| --- | --- | --- | --- |
| 1 | B | *y,w/+ ;UAS-CD8::GFP/+; hh-Gal4/repo-QF2,10xQUAS-6xm.Cherry* | Raised at 25oC |
| 1 | C | *w1118/+; tub-Gal80ts/+; Repo-Gal4/UAS-CD8::GFP* | Raised at 18oC till late-L2, then shifted to 29oC for 48 hours |
| 1 | D | *y,w/+; UAS-CD8::GFP/ UAS-EGFRDN; Repo-Gal4/ UAS-EGFRDN* | Raised at 18oC till late-L2, then shifted to 29oC for 48 hours |
| 1 | E | *y,w/+; UAS-CD8::GFP/+; R25A01-Gal4/+* | Raised at 29oC |
| 1 | F | *y,w/+; UAS-CD8::GFP/ UAS-EGFRDN; R25A01-Gal4/ UAS-EGFRDN* | Raised at 29oC |
| 1 | G | *w1118/+;; R25A01-Gal4/UAS-lacZ* | Raised at 29oC |
| 1 | H | *w1118/+; UAS-EGFRDN/+; R25A01-Gal4/ UAS-EGFRDN* | Raised at 29oC |
| 1- fig. supp.1 | B | *y,w/+; NP6293-Gal4/+; 10xUAS-myrGFP/+* | Raised at 29oC |
| 1- fig. supp.1 | C | *y,w/+; NP6293-Gal4/UAS-EGFRDN; UAS-EGFRDN/+* | Raised at 29oC |
| 1- fig. supp.1 | D | *w/+; NP2276-Gal4/+; 10xUAS-myrGFP/+* | Raised at 29oC |
| 1- fig. supp.1 | E | *w/+; NP2276-Gal4/ UAS-EGFRDN; UAS-EGFRDN/+* | Raised at 29oC |
| 1- fig. supp.1 | F | *w1118/+;; R54H02-Gal4/10xUAS-myrGFP* | Raised at 29oC |
| 1- fig. supp.1 | G | *w1118/+; UAS-EGFRDN/+; R54H02-Gal4/ UAS-EGFRDN* | Raised at 29oC |
| 1- fig. supp.1 | H | *w1118/+;; R10C12-Gal4/10xUAS-myrGFP* | Raised at 29oC |
| 1- fig. supp.1 | I | *w1118/+; UAS-EGFRDN/+; R10C12-Gal4/UAS-EGFRDN* | Raised at 29oC |
| 1- fig. supp.1 | J | *w/+; Mz97-Gal4, UAS-Stinger/+; 10xUAS-myrGFP/+* | Raised at 29oC |
| 1- fig. supp.1 | K | *w/+; Mz97-Gal4, UAS-Stinger/UAS-EGFRDN; UAS-EGFRDN/+* | Raised at 29oC |
| 1- fig. supp.1 | L | *w1118/+;; R53H12-Gal4/10xUAS-myrGFP* | Raised at 29oC |
| 1- fig. supp.1 | M | *w1118/+; UAS-EGFRDN/+; R53H12-Gal4/ UAS-EGFRDN* | Raised at 29oC |
| 1- fig. supp.1 | N | *y,w/+; tub-Gal80ts/+; R25A01-Gal4/UAS-EGFRDN* | Raised at 29oC |
| 1- fig. supp.1 | O,Q | *y,w/+; UAS-LifeAct-GFP/UAS-nls.lacZ; R25A01-Gal4/UAS-nls.lacZ* | Raised at 29oC |
| 1- fig. supp.1 | P,R | *y,w,hsflp122/+; UAS-LifeAct-GFP/UAS-EGFRDN; R25A01-Gal4/UAS-EGFRDN* | Raised at 29oC |
| 1- fig. supp.1 | S | *Canton S* | Raised at 29oC |
| 1- fig. supp.1 | T | *y,w/+; UAS-EGFRDN/+; R25A01-Gal4/UAS-EGFRDN* | Raised at 29oC |
| 2 | A | *w1118/+;; R25A01-Gal4/UAS-lacZ* | Raised at 29oC |
| 2 | B,C,D | *w1118/+;; R25A01-Gal4/ UAS-EGFRDN* | Raised at 29oC |
| 3 | A | *y,w; GMR-Gal4/+; rho3PLLb, UAS-CD8::GFP* | Raised at 29oC |
| 3 | B,C | *y,w; GMR-Gal4/UAS-rho3-3xHA; rho3PLLb, UAS-CD8::GFP* | Raised at 29oC |
| 3 | D,E | *w1118/+;; R25A01-Gal4/UAS-CD8::GFP* | Raised at 29oC |
| 3 | F,G | *w1118/+; UAS-EGFRDN/+; R25A01-Gal4/ UAS-CD8::GFP* | Raised at 29oC |
| 3 | H,I | *w1118/+; UAS-EGFRDN/+; R25A01-Gal4/ UAS-m.spi* | Raised at 29oC |
| 3 | J,K | *w1118/+; UAS-EGFRDN/+; R25A01-Gal4/UAS-Cg25c::RFP* | Raised at 29oC |
| 3 | L,M | *w1118/+;UAS-EGFRDN/UAS-nls.lacZ; R25A01-Gal4/UAS-nls.lacZ* | Raised at 29oC |
| 3 | N,O | *w1118/+;UAS-EGFRDN/ UAS-Col4a1EY11094; R25A01-Gal4/UAS-m.spi* | Raised at 29oC |
| 3 | Q | *w1118/+;; R25A01-Gal4/UAS-m.spi* | Raised at 29oC |
| 3 | R | *w1118/+;; R25A01-Gal4/UAS-Cg25c::RFP* | Raised at 29oC |
| 3 | T | *w1118/+;UAS-Dcr2/UAS-SpiRNAi; R25A01-Gal4/+* | Raised at 29oC |
| 3 | U | *w1118/+;UAS-Dcr2/UAS-Col4a1RNAiv28369; R25A01-Gal4/+* | Raised at 29oC |
| 3 | V | *w1118/+;UAS-Dcr2/UAS-SpiRNAi; R25A01-Gal4/UAS-Col4a1RNAiv104536* | Raised at 29oC |
| 3-fig. supp. 1 | A | *w1118/+;; R25A01-Gal4/UAS-lacZ* | Raised at 29oC |
| 3-fig. supp. 1 | B | *y,w/+; UAS-EGFRDN/+; R25A01-Gal4/UAS-nls.lacZ* | Raised at 29oC |
| 3-fig. supp. 1 | C | See list of *Drosophila* stocks for specific strains used. | Raised at 29oC |
| 3-fig. supp. 1 | D | *w/+;; bnlNP2211-Gal4/ UAS-CD8::GFP* | Raised at 29oC |
| 3-fig. supp. 1 | E | *w/+; thsMI07139-Gal4/+; MKRS/UAS-CD8::GFP* | Raised at 29oC |
| 3-fig. supp. 1 | F | *y,w/+; Cg-Gal4/+; UAS-CD8::GFP/+* | Raised at 29oC |
| 3-fig. supp. 1 | G | *y,w/+; SpiNP0289-Gal4/+; UAS-CD8::GFP/+* | Raised at 29oC |
| 3-fig. supp. 1 | H, I | *w1118/+;; R25A01-Gal4/UAS-CD8::GFP* | Raised at 29oC |
| 3-fig. supp. 1 | J | *w1118/+; UAS-EGFRDN/+; R25A01-Gal4/ UAS-s.spi* | Raised at 29oC |
| 3-fig. supp. 1 | L,N | *y,w/+; UAS-CD8::GFP/ UAS-EGFRDN; R25A01-Gal4/ UAS-EGFRDN* | Raised at 29oC |
| 3-fig. supp. 1 | P | *w1118/+; DdrCR01018-Gal4/+; UAS-lacZ/+* | Raised at 29oC |
| 3-fig. supp. 1 | Q | *Canton S* | Raised at 25oC |
| 3-fig. supp. 1 | R | *w1118/+; UAS-EGFRDN/+; R25A01-Gal4/ UAS-m.spi* | Raised at 29oC |
| 3-fig. supp. 1 | S | *w1118/+; UAS-EGFRDN/+; R25A01-Gal4/UAS-Cg25c::RFP* | Raised at 29oC |
| 3- fig. supp. 2 | A | *w1118/+;; R25A01-Gal4/UAS-lacZ* | Raised at 29oC |
| 3-fig. supp. 2 | B | *w1118/+;UAS-Dcr2/UAS-SpiRNAi; R25A01-Gal4/UAS-Col4a1RNAiv104536* | Raised at 29oC |
| 4 | A,B | *Canton S* | Raised at 25oC |
| 4 | C,D | *ey-Gal80/+; tub-Gal80ts/+; R27G05/UAS-PntP1* | Raised at 18oC till the late second larval instar (L2), then shifted to 29oC for 48 hours |
| 4-fig. supp. 1 | A,B | *ey-Gal80/+; tub-Gal80ts/+; R27G05/UAS-lacZ* | Raised at 18oC till the late second larval instar (L2), then shifted to 29oC for 48 hours |
| 4-fig. supp. 1 | C,D | *ey-Gal80/+; tub-Gal80ts/UAS-rlSEM; R27G05/+* | Raised at 18oC till the late second larval instar (L2), then shifted to 29oC for 48 hours |
| 5 | A,B | *w;;FRT80B, DroncI24* | Raised at 25oC |
| 5 | D,E | *;;aosw11/+* | Raised at 29oC |
| 5 | F | *w1118; R64B07-Gal4/UAS-nls.lacZ; UAS-Dcr-2/+* | Raised at 29oC |
| 5 | G | *w1118; R64B07-Gal4/UAS-aosRNAi; UAS-Dcr-2/+* | Raised at 29oC |
| 5- fig. supp.1 | A | *w1118/+;R64B07-Gal4/+;UAS-CD8::GFP/+* | Raised at 29oC |
